1 Aberrant axonal pathfinding and exuberant myelination in an inducible model of neocortical  
2 heterotopia

3 **Authors:** Alice M. Li<sup>1,3</sup>, Robert A. Hill<sup>2,3\*</sup>, and Jaime Grutzendler<sup>1,3,4\*</sup>

4 <sup>1</sup> Interdepartmental Neuroscience Program, Yale School of Medicine, New Haven, CT, 06520,  
5 USA.

6 <sup>2</sup> Department of Biological Sciences, Dartmouth College, Hanover, NH, 03755, USA.

7 <sup>3</sup> Department of Neurology, Yale School of Medicine, New Haven, CT, 06520, USA.

8 <sup>4</sup> Department of Neuroscience, Yale School of Medicine, New Haven, CT, 06520, USA.

9 \*Correspondence: [robert.hill@dartmouth.edu](mailto:robert.hill@dartmouth.edu); [jaimе.grutzendler@yale.edu](mailto:jaimе.grutzendler@yale.edu)

10 **ABSTRACT**

11

12 Neocortical heterotopia consist of ectopic neuronal clusters that are frequently found in  
13 individuals with cognitive disability and epilepsy. However, their pathogenesis remains poorly  
14 understood due in part to a lack of tractable animal models. We have developed an inducible  
15 model of focal heterotopia that enables their precise spatiotemporal control and high-resolution  
16 optical imaging in live mice. Here we report that heterotopia are associated with striking patterns  
17 of hypermyelinated and circumferentially projecting axons around neuronal clusters. Despite their  
18 aberrant axonal patterns, *in vivo* calcium imaging revealed that heterotopic neurons remain  
19 functionally connected to other brain regions, highlighting their potential to influence global neural  
20 networks. These aberrant patterns only form when heterotopia are induced during a critical  
21 embryonic temporal window, but not in early postnatal development. Our model provides a new  
22 way to investigate heterotopia formation *in vivo* and revealed features suggesting the existence  
23 of developmentally-modulated, neuron-derived axon guidance and myelination factors.

## 24 INTRODUCTION

25

26 Up to one third of routine postmortem examinations reveal the presence of neocortical  
27 heterotopia<sup>1-4</sup>, a heterogeneous group of focal cortical lamination defects characterized by  
28 abnormally positioned clusters of neurons<sup>5,6</sup>. Heterotopia have been linked to many neurological  
29 conditions including epilepsy, intellectual disability, and dyslexia<sup>3,7-12</sup>. However, comprehensive  
30 exploration of their pathogenesis and pathophysiology has been limited by a lack of tools for their  
31 investigation in the live animal. Several genetic, traumatic, chemotoxic and other neocortical  
32 heterotopia models have been described<sup>13-21</sup>. However, these previous models have not been  
33 utilized for cellular intravital optical imaging analyses largely due to the lack of control over the  
34 position and timing of heterotopia induction and/or limited means for targeted cell labelling.

35 Here, we developed a methodology enabling the specific induction and visualization of  
36 focal heterotopia in the live mammalian neocortex. Our model uses *in utero* electroporation<sup>22-24</sup>  
37 combined with *in vivo* optical imaging, to generate and track layer I cortical heterotopia. When  
38 visualized using label free myelin imaging<sup>25-27</sup>, we identify striking patterns of aberrantly projecting  
39 and hypermyelinated axons surrounding the heterotopic neurons. These distinct patterns emerge  
40 only when the heterotopia are induced during a critical embryonic period, suggesting the presence  
41 of locally-derived, developmentally-modulated signals that initiate the abnormal structural  
42 organization and myelination of the heterotopic axons. Identification and characterization of the  
43 neuronal and glial subtypes within the induced heterotopia revealed many consistent features that  
44 are used to define spontaneously occurring heterotopia in both humans<sup>28,29</sup> and rodent  
45 models<sup>18,30-33</sup>. Finally, using genetically encoded calcium biosensors, we reveal that heterotopic  
46 neurons display similar calcium transient frequencies as neighboring layer II/III neurons and  
47 respond to sensorimotor stimulation in behaving mice, opening new possibilities for the  
48 exploration of their influence on cortical function.

## 49 RESULTS

50

### 51 **Spatiotemporally precise layer I heterotopia generation and visualization in the live mouse** 52 **brain**

53 *In utero* electroporation (IUE) is a powerful technique that permits labeling and genetic  
54 manipulation of targeted cortical neurons<sup>22–24</sup>. As part of the IUE procedure, a thin glass  
55 microcapillary needle is used to deliver genetic material into the lateral ventricle of embryonic  
56 stage animals for the electroporation of neuronal progenitors (Fig. 1a). While implementing IUE  
57 to label and image cortical axons *in vivo*, we unexpectedly found that cortical sites that had been  
58 injected during the procedure developed marked accumulations of labelled neuronal cell bodies  
59 in layer I of adult mice (Fig. 1c, top row). Electroporated pyramidal cells are normally found in  
60 layers II/III of cortical regions, thus their distinct presence at injected layer I sites stood out in  
61 contrast to non-injected surrounding cortical areas (Fig. 1c, top row). *In vivo* labeling of neurons  
62 with a fluorescent dye called NeuO<sup>34</sup> further revealed that the IUE-labelled neuronal cell bodies  
63 constituted only a small fraction of the total neuronal cell bodies ectopically positioned (Fig. 1b, c;  
64 for detailed statistics see Supplementary File 1; mean diameter of NeuO<sup>+</sup> ectopic cell clusters 474  
65  $\pm 174 \mu\text{m}$  s.d. in  $n = 23$  mice). Abnormal superficial clustering of neuronal cell bodies is a defining  
66 feature of layer I heterotopia<sup>1,4,28</sup>, a subtype of neocortical heterotopia that has been linked to  
67 learning impairments in humans<sup>7,35,36</sup>. Their presence demonstrates that direct injections into the  
68 cortex performed as part the IUE procedure can induce molecularly tractable neocortical  
69 heterotopia *in vivo*.

70

### 71 **Aberrant axonal and myelin patterns characterize layer I heterotopia formed during a** 72 **critical embryonic time window.**

73 Using this methodology, we set out to examine the cellular composition of the layer I  
74 heterotopia. Interestingly, we observed markedly aberrant patterns of myelinated axons

75 exclusively associated with the ectopic neuronal clusters (Fig. 2a and Fig. 3a), as visualized *in*  
76 *vivo* by spectral confocal reflectance microscopy (SCoRe), a technique that enables high  
77 resolution label-free imaging of myelinated axons<sup>25,26</sup>. This was further corroborated by fixed  
78 tissue immunohistochemistry of myelin markers, showing increased oligodendrocyte and myelin  
79 densities at the sites of injection (Fig. 2b-d, Fig. 3e-g, and Figure 3–figure supplement 1; for  
80 detailed statistics see Supplementary File 1). On closer examination *in vivo*, we observed both  
81 myelinated and unmyelinated axons swirling in a nest-like fashion around heterotopic neurons  
82 (Fig. 2a, Fig. 3a-d, and Figure 3–figure supplement 1), often forming thick concentric borders that  
83 were most prominent towards the pial surface (Fig. 3e-g and Video 1). Radially-oriented,  
84 myelinated fiber bundles were also observed projecting out from underneath the heterotopia (Fig.  
85 2b-c and Figure 2–figure supplement 1), similar to previous descriptions of spontaneously  
86 occurring layer I heterotopia<sup>28–31</sup>. Thus, by applying our methodology in combination with SCoRe  
87 microscopy and immunohistochemical analyses, we discovered that distinct axon guidance and  
88 myelin abnormalities occur in embryonically-induced layer I heterotopia.

89 To investigate whether the marked axonal and myelin changes were dependent on  
90 induction of heterotopia at specific developmental ages, we performed IUE at various time points  
91 during cortical development between embryonic day 14 (E14) to E17, and postnatal day 0 (P0).  
92 We found that whereas embryonic injections always resulted in similar nest-like patterns of  
93 densely myelinated fiber bundles around heterotopic neurons (Fig. 4, Fig. 5b), P0 injections did  
94 not result in robust axon guidance or myelination abnormalities, despite the presence of ectopic  
95 neural clusters (Fig. 5a). Although postnatally-induced heterotopia tended to be smaller and more  
96 variable in size (data not shown), the axonal and myelin abnormalities were never observed even  
97 around larger P0-induced clusters (Fig. 5a). Consistent with this, we found no significant  
98 difference in the myelin or oligodendrocyte cell body densities (Fig. 5c; for detailed statistics see  
99 Supplementary File 1) between heterotopia and contralateral control regions of P0-injected mice.  
100 Likewise, immunolabelling for neurofilament heavy chain (NF-H) did not reveal aberrant

101 accumulations of axonal fibers (Fig. 5a). Together, our data indicate previously unrecognized  
102 differences in the cellular composition and organization of neocortical heterotopia based on the  
103 timing of their induction.

104

### 105 **Astrocyte and microglia cell densities are not altered in induced heterotopia**

106 Given the striking abnormalities in oligodendrocyte production, myelination and axon  
107 pathfinding observed in the embryonically-induced heterotopia, we next wondered whether other  
108 glial cell types such as astrocytes and microglia also exhibited altered morphology or density.  
109 Immunolabelled cortical brain sections against Aldh1L1 revealed no significant difference in the  
110 astrocyte cell density between layer I heterotopia and corresponding contralateral control regions  
111 (Fig. 6a-c; for detailed statistics see Supplementary File 1). Similarly, using Iba1 immunolabelling,  
112 we found no regional differences in microglia density or morphology (Fig. 6d-f; for detailed  
113 statistics see Supplementary File 1). Moreover, there was no evidence of pronounced astrocytic  
114 or microglial accumulation or altered cellular morphology at the borders of the heterotopia  
115 suggesting that a glial scar had not formed due to the embryonic injection. These data suggest  
116 that while heterotopia induce marked oligodendrocyte generation, astrocytes and microglia are  
117 not significantly influenced by potential local factors derived from ectopic neuronal clusters.

118

### 119 **Heterotopia contain a variety of excitatory and inhibitory neurons born at different** 120 **embryonic ages**

121 To characterize the neural composition of the induced heterotopia, we examined the  
122 expression of neuronal subtype markers Cux1, Tle4, and GAD-67 (Fig. 7). Cux1 is a transcription  
123 factor predominantly expressed in callosal projection neurons in layers II-IV<sup>37</sup>, whereas Tle4 is  
124 primarily restricted to deeper corticothalamic projection neurons of layers V and VI<sup>38,39</sup>. We found  
125 both Cux1<sup>+</sup> and Tle4<sup>+</sup> neurons present to varying degrees in all layer I heterotopia (Fig. 7b, c and  
126 Figure 7–figure supplement 1), consistent with a mixed population of excitatory projection neurons

127 from different cortical layers. Further analyses revealed the presence of GAD67<sup>+</sup> interneurons,  
128 which occurred at similar densities within heterotopia as in corresponding layer I control regions  
129 (Fig. 7d-f; for detailed statistics see Supplementary File 1). In addition, layer I heterotopia always  
130 contained GAD67<sup>+</sup> puncta, consistent with inhibitory synapses (Fig. 7d, e). Together, our findings  
131 suggest that induced layer I heterotopic neural clusters comprise a diverse cohort of glutamatergic  
132 and GABAergic neurons, in line with the heterogeneous population of neuronal subtypes  
133 previously described in those occurring spontaneously<sup>31,33,40,41</sup>.

134 We next used birthdating techniques to determine whether neurons within the induced  
135 heterotopia originate at similar or different time points during development. 5-Ethynyl-2'-  
136 deoxyuridine (EdU) pulse labelling at E11.5 revealed small but distinct populations of EdU<sup>+</sup>NeuN<sup>+</sup>  
137 cells in all embryonically-generated layer I heterotopia (Figure 7-figure supplement 2), suggesting  
138 that heterotopia contain neurons born during early corticogenesis<sup>42,43</sup>. We also observed cells  
139 "birthdate-labelled" via IUE<sup>22</sup> at E15 (~90% heterotopia in  $n > 30$  mice; Fig. 1c) in heterotopia,  
140 suggesting the additional presence of later-born neurons. These data indicate that induced  
141 heterotopia contain neurons born at various stages of cortical development.

142

### 143 **Heterotopic neurons exhibit similar calcium dynamics as neighboring normotopic neurons**

144 Despite their linkage to a wide spectrum of neurological disorders, the cellular dynamics  
145 and mechanisms by which individual heterotopic cells contribute to neural circuit dysfunction are  
146 poorly understood. We examined the calcium activity of single cortical neurons in induced  
147 heterotopia and in surrounding, non-injected cortical layer II/III regions of awake head-fixed mice  
148 using the genetically encoded calcium indicator, GCaMP6f. Surprisingly, although we found highly  
149 variable calcium spike patterns of individual cells within heterotopia (Fig. 8a-c and Video 2), there  
150 were no significant differences in their overall calcium spike event frequency, variance, or  
151 synchrony compared to surrounding non-heterotopic layer II/III regions (Fig. 8d; for detailed  
152 statistics see Supplementary File 1). Furthermore, we did not identify any epileptiform activity in

153 our imaging sessions, although we cannot rule out that continuous recordings could have  
154 revealed sporadic aberrant activity (Fig. 8a-c and Video 2). Interestingly, we found that mice that  
155 had been startled with brief whisker stimulation consistently responded via neuronal calcium  
156 spikes within layer I heterotopia (Fig. 8e, f and Video 3). This result indicates that heterotopic  
157 neurons are connected to other brain areas and could thus influence network function.



158 **DISCUSSION**

159

160 Here we describe an inducible model that allows the visualization of focal heterotopia at  
161 cellular resolution in the live animal. By mechanically puncturing the cortex as part of the IUE  
162 procedure we induce a targeted layer I heterotopia that can be repeatedly imaged *in vivo*. Pairing  
163 this methodology with intravital fluorescence and label-free (SCoRe) microscopy of neuronal cell  
164 bodies, axons and myelin, as well as time lapse axonal and calcium imaging<sup>22,23,25,34,44</sup>, enables  
165 detailed studies of heterotopia in the intact brain.

166 Many animal models of focal heterotopia have been described however most involve  
167 subcortical or intrahippocampal heterotopia<sup>13,14,17,19,45</sup>, which are not easily amenable to intravital  
168 optical imaging due to their distance from the cortical surface. Moreover, other animal models of  
169 more superficially-occurring heterotopia<sup>15,16,18,21,46</sup> have not been imaged successfully at high  
170 resolution *in vivo* mainly as a result of their temporally and spatially unpredictable nature and/or  
171 lack of visible cell transfection. Our methodology improves upon these limitations by employing  
172 minimally invasive microinjections to both induce layer I heterotopia and deliver plasmid DNA or  
173 viral vectors for cellular genetic manipulation in the live mouse.

174 Using our model, we revealed several striking characteristics of neocortical heterotopia.  
175 First, we discovered that axonal projections within layer I heterotopia formed swirled and  
176 concentric morphologies specifically around heterotopic neuronal clusters. Interestingly there was  
177 no evidence of glial scarring or mechanical tissue barriers surrounding the heterotopia, suggesting  
178 that the directional changes in axon pathfinding were instead likely mediated by disruptions in the  
179 precise balance of repulsive and attractive gradients of local axon guidance cues<sup>47-51</sup>. These axon  
180 pathfinding abnormalities led us to investigate whether the developmental timing of heterotopia  
181 induction could modulate their formation. We found that whereas embryonically-induced  
182 heterotopia always displayed distinct axon guidance abnormalities, similar defects were not

183 observed in postnatally-induced heterotopia. This surprising finding suggested the presence of a  
184 critical gestational time period during which cortical axon pathfinding is uniquely sensitive to local  
185 environmental disturbances. The distinct responsiveness of axons during this critical period could  
186 be mediated by the enhanced expression of axon growth cone receptors that increase the ability  
187 of axons to extend toward guidance cues<sup>52,53</sup>. However, developmentally modulated changes in  
188 the signaling gradients of guidance cues themselves could also play a role<sup>54</sup>.

189 In addition to aberrant axonal organization, we used label-free SCoRe *in vivo* imaging to  
190 discover restricted hypermyelination specifically within the heterotopia. This focal  
191 hypermyelination was due to an increased production of myelinating oligodendrocytes that  
192 deposited myelin sheaths primarily along the aberrantly projecting and concentric axons.  
193 Interestingly, the hypermyelination was only observed in embryonically-induced but never in  
194 postnatally-induced heterotopia. Similar to the critical period for disrupted axonal patterning, these  
195 data suggest that the myelination of embryonically-induced heterotopia is instructed by  
196 developmentally regulated molecules or biophysical cues, which could accelerate the local  
197 production of myelin by stimulating oligodendrocyte precursor cell recruitment and/or  
198 differentiation. Myelin formation is influenced by axon caliber<sup>55</sup> and genetic manipulations  
199 increasing axon caliber can trigger oligodendrocyte precursor cell proliferation and the  
200 ensheathment of classically unmyelinated fibers<sup>56</sup>. Thus, axon caliber could serve as one  
201 mechanism that differs between the aberrantly projecting axons found in embryonically-induced  
202 heterotopia compared to adjacent non-myelinated cortical axons. Other potential causes for the  
203 localized hypermyelination of heterotopic axons could include cell surface markers or molecular  
204 identity. Specific subpopulations of excitatory<sup>57</sup> and inhibitory<sup>58</sup> neurons exhibit variable  
205 myelination patterns, seemingly not directly linked to axon caliber, but instead potentially due to  
206 their differential expression of adhesion molecules or altered patterns of neuronal activity. Our  
207 model provides a novel means to test these possibilities in future studies.

208           Despite the striking axon and myelin abnormalities associated with the induced  
209 heterotopia, we found no evidence of spontaneous epileptiform activity occurring in heterotopic  
210 regions or nearby non-heterotopic cortices of awake animals, consistent with previous  
211 studies<sup>40,59,60</sup>. Moreover, spontaneous calcium fluctuations and relative synchrony of firing  
212 between neurons in layer I heterotopia and neighboring layer II/III cortex were similar. This lack  
213 of observable difference in activity may reflect the similar neural composition of both brain areas,  
214 which could enable a similar balance of excitatory and inhibitory inputs to these regions. Indeed,  
215 we identified Cux1<sup>+</sup> cells, GABAergic neurons and GABAergic puncta in layer I heterotopia that  
216 are also prevalent in layers II/III<sup>37,61–63</sup>. A second, non-mutually exclusive possibility is that more  
217 metabolically demanding conditions are required to trigger aberrant activity in mice with induced  
218 heterotopia. Consistent with this hypothesis, the application of normally subthreshold doses of  
219 convulsant drugs can provoke epileptiform activity in mice with heterotopia *in vitro*<sup>64</sup> and *in*  
220 *vivo*<sup>59,64,65</sup>. Other animal models of heterotopia, such as the *tish* mutant<sup>13</sup> and Ihara's genetically  
221 epileptic rat<sup>19</sup> have documented spontaneous epileptiform activity *in vivo*. Reasons for this  
222 difference from our findings remain unclear, however they may be related to disparities in the  
223 number, location or size of heterotopia, or unknown off-target effects of the inherited mutations  
224 themselves in the genetic models.

225           There is little known about the functional dynamics of individual heterotopic neurons during  
226 behavioral stimulation in the live animal. Using time-lapse calcium imaging, we revealed that  
227 heterotopic neurons display robust responses following brief whisker stimulation in awake mice,  
228 consistent with the functional connectivity implicated by previous anatomical, electrophysiological,  
229 and behavioral studies<sup>13,40,59,66–69</sup>. This functional connectivity suggests that, even though we did  
230 not detect aberrant spontaneous activity within heterotopia, these neurons are integrated into the  
231 local neural network and are potentially capable of altering neural network function at baseline or  
232 under metabolically demanding conditions.

233           We describe an inducible model of heterotopia amenable to intravital visualization that  
234 closely mimics the neural, glial, axonal, and myelin profiles of those occurring spontaneously in  
235 layer I<sup>28,33</sup>. Building upon previous models, this system employs *in utero* microinjections to directly  
236 provoke the disruptions in pial basement membrane and radial glial scaffolding thought to  
237 culminate in the neural migration defects leading to their development<sup>70</sup>. Importantly, this model  
238 allows imaging of the downstream effects of this disruption using multiple optical, functional, and  
239 molecular probes for different cell subtypes<sup>22,23,25,34,44</sup>, adding a powerful new tool for the study of  
240 cortical malformations in the live mammalian brain.

241 **MATERIALS AND METHODS**

242

243 *Animals*

244 All experimental approaches and procedures were conducted in accordance with Yale  
245 University Institutional Animal Care and Use Committee regulations. Timed pregnant outbred  
246 CD1 mice were purchased from Charles River Laboratories, Inc, with the first 24 hours of  
247 postnatal life designated as P0. We included both male and female mice, aged to P30 – P60, for  
248 this study. For some birth dating experiments as described in the text, pregnant dams were given  
249 a single intraperitoneal (i.p.) injection of EdU (30  $\mu\text{g g}^{-1}$  body weight) at E11.5, prior to IUE surgery  
250 at E15. Litters were kept in individual ventilated cages until weaning age (P21), after which mice  
251 were housed in single-sex groups with 2 – 5 animals per unit. Cages were maintained in  
252 temperature-controlled facilities with 12-hour light/12-hour dark cycles.

253

254 *In utero intracranial injection, electroporation and viral infection*

255 Embryonic cortical injections were performed as part of the IUE procedure during needle  
256 insertion into the lateral ventricle<sup>23,71</sup>. Embryos were injected once unilaterally  
257 between embryonic day 14 – 17 (E14 - E17) for all electroporations, as specified in the  
258 text. Intracranial injections were not performed at gestational ages below E14 or over E17 due to  
259 the technical challenges associated with maintaining embryo viability. To  
260 keep consistent experimental design parameters, however, all quantifications for *in vivo* and  
261 fixed tissue analyses used only E15-injected embryos.

262 All *in utero* injections were targeted toward prospective somatosensory cortices.  
263 Injection solutions included the following plasmid and viral components for neuronal  
264 labelling: pCAG-tdTomato (based on Addgene plasmid 11150) and rAAV8-hSyn-eGFP (UNC  
265 Vector Core, Lot AV5075D; titer 3.9e12 GC ml<sup>-1</sup>). Injection solutions contained either pCAG-  
266 tdTomato (1.5  $\mu\text{g } \mu\text{L}^{-1}$  final concentration) only, or both pCAG-tdTomato (1.5  $\mu\text{g } \mu\text{L}^{-1}$  final

267 concentration) and AAV8-hSyn-eGFP (final titer  $3.9 \times 10^{11}$  GC ml<sup>-1</sup>) in saline solution. All injection  
268 solutions contained Fast Green FCF dye (TCI; 2 mg ml<sup>-1</sup>) to facilitate their visual tracking during  
269 the injection procedure. Procedures for *in utero* electroporation have been previously  
270 described<sup>23,71</sup>. Briefly, timed pregnant CD1 dams were anesthetized with a saline solution  
271 containing both ketamine (100 - 120 mg kg<sup>-1</sup>) and xylazine (10 - 12 mg kg<sup>-1</sup>), delivered i.p.  
272 Following induction of deep surgical anesthesia, midline incisions (1¼ inch) were made into the  
273 abdominal skin and muscle wall to access the underlying uterus. Pulled glass capillary needles  
274 (10 µL Drummond Scientific Glass Capillaries, Cat# 3-000-210-G; pulled to ~ 50 µm diameter at  
275 tip and ~ 125 µm diameter at 1mm above tip) were then used to puncture the uterine wall and  
276 deliver (Picospritzer II, General Valve) 0.5 µl of injection solution into the lateral ventricle of  
277 individual embryos. Each embryo was injected only once and subsequently electroporated using  
278 BTX tweezerrodes aimed at the somatosensory cortex of the injected hemisphere.  
279 All electroporations were conducted using four 50 ms, 50 V electrical pulses, delivered at 1  
280 second intervals (BTX Harvard Apparatus 8300 pulse generator).

281

### 282 *Postnatal intracranial viral injection*

283 Intracranial injections were performed on P0 pups from timed pregnant CD1 dams that  
284 were naïve to the *in utero* electroporation procedure. Injection solutions included one of the  
285 following viruses to mark injected regions: rAAV8-hSyn-eGFP (UNC Vector Core, Lot AV5075D;  
286 titer  $3.9 \times 10^{12}$  GC ml<sup>-1</sup>) and rAAV2-CaMKIIa-mCherry (UNC Vector Core, Lot AV4377d,  $3.8 \times 10^{12}$  titer  
287 GC ml<sup>-1</sup>). P0 intracranial injections were performed essentially as previously described<sup>72</sup>. Briefly,  
288 neonates were cryoanesthetized<sup>73</sup> within 24 hours following birth. After confirming loss of  
289 voluntary movement, neonates were placed in the prone position on a polymer cooling block. A  
290 pulled glass capillary needle (10 µl Drummond Scientific Glass Capillaries, Cat# 3-000-210-G;  
291 pulled to ~ 75 µm diameter at tip and ~ 325 µm diameter at 4 mm above tip), advanced 4mm past  
292 the dorsal scalp at a 90° angle, was then used to deliver into the brain parenchyma 1 µl of virus

293 solution (diluted 1:10 in PBS and 2 mg ml<sup>-1</sup> Fast Green FCF, TCI from stock). Each neonate  
294 received only one unilateral intracranial injection targeted over somatosensory cortices. Injected  
295 neonates were then rewarmed on a heating pad and placed back with their biological mother. All  
296 P0-injected mice were sacrificed for analysis at P30, with quantifications and analyses performed  
297 in fixed tissue to circumvent the obstructive meningeal scarring and parenchymal adhesions  
298 associated with P0-injections on *in vivo* imaging.

299

### 300 *Postnatal subarachnoid viral injection*

301 Injection solutions were prepared using AAV9-Syn-GCaMP6f-WPRE-SV40 (Penn Vector  
302 Core, Lot CS1001; titer 7.648e13 GC ml<sup>-1</sup>) virus diluted 1:100 in PBS and Fast Green FCF (TCI;  
303 2 mg ml<sup>-1</sup>). P21- P30 mice that had previously been electroporated *in utero* were anesthetized by  
304 intraperitoneal injections of ketamine (100 mg kg<sup>-1</sup>) and xylazine (10 mg kg<sup>-1</sup>). The scalp was  
305 shaved, cleaned, and then incised to expose the underlying bone. A high speed drill was next  
306 employed to introduce a small burr hole (~ 0.75 mm diameter) over the transfected hemisphere,  
307 taking care to avoid cortical regions suspected to have been directly punctured as part of the *in*  
308 *utero* electroporation procedure. The underlying dura was gently detached, and a 12 µL volume  
309 of injection solution (prepared as described above) was infused into the subarachnoid space to  
310 achieve viral transfection of both layer I heterotopic and layer II/III neurons via topical cortical  
311 application. The scalp incision was then closed with sutures. Cranial windows for *in vivo* imaging  
312 were prepared over injected cortical hemispheres 3 – 4 weeks following the subarachnoid AAV  
313 infusion.

314

### 315 *Cranial window surgery and in vivo imaging*

316 All *in vivo* imaging was performed using cranial windows<sup>26</sup>. Briefly, mice were  
317 anesthetized using ketamine (100 mg kg<sup>-1</sup>) and xylazine (10 mg kg<sup>-1</sup>), delivered via i.p. injection.  
318 The dorsal skull surgical field was shaved and cleaned, and a ~4 mm diameter circular region of

319 skull and dura mater was excised from the injected hemisphere. A #0 transparent glass coverslip  
320 was then gently implanted on top of uncovered pial surface to serve as the cranial window. Glue  
321 and dental cement were applied to secure the window to surrounding skull bone.

322 To detect neuronal cell bodies *in vivo* as described in the text, the fluorescent membrane-  
323 permeable probe NeuO (NeuroFluor, Stemcell Technologies Cat# 01801, diluted 1:25 in PBS)  
324 was applied to exposed cortex for 20 min followed by a 1-2 min PBS rinse, before the placement  
325 of the #0 glass coverslip during the cranial window surgery. In some cases, 100  $\mu$ L Evans blue  
326 (TCI; 1 mg ml<sup>-1</sup>) was injected intravenously after the cranial window surgery to label the cortical  
327 vasculature.

328 Except for GCaMP6f calcium imaging experiments, all *in vivo* imaging studies used mice  
329 that were anesthetized via i.p. ketamine and xylazine injection. *In vivo* imaging of anesthetized  
330 mice was performed at P30 immediately after cranial window surgery. All  
331 intravital GCaMP6f calcium imaging was carried out in P50 - P60 awake head-fixed mice starting  
332 four hours after arousal from cranial window surgical anesthesia.

333 Confocal *in vivo* images of previously injected cortical areas with or without the needle  
334 tract sites were acquired using a 20X water immersion objective (Leica, 1.0 NA) on a Leica SP5  
335 upright laser scanning microscope. Spectral confocal reflectance (SCoRe) imaging to detect  
336 myelinated axon segments was performed as previously described<sup>25,26</sup> by capturing the  
337 simultaneously reflected light signals from 488 nm, 561 nm, and 633 nm multi-wavelength laser  
338 excitation outputs. Single-photon laser outputs were tuned to the following excitation wavelengths  
339 for fluorescence imaging: 488 nm for GFP and NeuO; 561nm for tdTomato and mCherry; 633nm  
340 for Evans Blue. Sequential imaging was employed to minimize overlap between SCoRe reflection  
341 and individual fluorescence emission signals for all *in vivo* confocal imaging experiments.

342 Needle tracts from injections performed *in utero* were identified by the abrupt changes in  
343 orientations of labelled dendritic and axonal processes around breaks in the cortical surface *in*  
344 *vivo*. Since needle tracts identified in this manner always displayed ectopic neural clusters of



345 similar expanse in layer I, the outer boundaries of ‘heterotopia’ *in vivo* were defined as the layer I  
346 needle tract borders for all quantifications. Ipsilateral, non-injected cortical areas were defined as  
347 layer I regions at least 150  $\mu\text{m}$  away from a discernable injection site border. Heterotopia and  
348 ipsilateral control regions were imaged using identical laser output and image acquisition  
349 configurations that were determined for each experimental data set. Confocal z-stacks were  
350 acquired at  $1024 \times 1024$  pixel resolution starting from the pia through depths of up to 120  $\mu\text{m}$   
351 below the cortical pial surface. In some cases, time lapse imaging of *in utero*-induced  
352 heterotopia was also performed at  $512 \times 512$  pixel resolution.

353 For some GCaMP6f calcium imaging experiments that involved visualization of deeper  
354 cortical regions in layers II/III as indicated in the text, time-lapse fluorescence images were  
355 acquired using a 20X water immersion objective (Zeiss, 1.0 NA) on a Prairie Technologies two-  
356 photon microscope fitted with a mode-locked, tunable Spectra Physics Mai-Tai laser. In these  
357 experiments, the two-photon laser was tuned to 920nm for excitation of both GCaMP6f and  
358 TdTomato fluorophores. All two-photon time-lapse imaging was performed at  $512 \times 512$   
359 pixel resolution.

360

### 361 *In vivo image processing and quantification*

362 Except for GCaMP6f calcium imaging experiments which were conducted using P50 - P60  
363 mice, all intravital imaging studies were performed using P30 mice, with quantifications carried  
364 out on those that had previously been injected at E15. All *in vivo* images were processed and  
365 quantified using ImageJ/FIJI.

366 For SCoRe density quantifications, we analyzed single z-sections located 10  $\mu\text{m}$  deep to  
367 the cortical pial surface from both heterotopic and ipsilateral control regions. SCoRe density  
368 values were assessed using a custom-built, automated thresholding and binarization macro in  
369 Image/FIJI, with Robust Automatic Threshold parameters set to noise = 25, lambda = 3, min =  
370 31. Randomly selected, equally sized regions of interest (ROIs) were used to

371 determine SCoRe density values within the centers and edges of the heterotopia versus  
372 control regions. A 'heterotopion center' was defined as the circular region with a radius extending  
373 from the needle tract center to 1/3 of the radius of the needle tract. A 'heterotopion edge'  
374 was defined as the needle tract concentric circular region just outside the 'heterotopion center',  
375 extending from the 'heterotopion center' outer edge to the outermost border of the needle tract.  
376 Average SCoRe densities were determined for the heterotopion center, heterotopion edge and  
377 control area for each mouse ( $n = 8$  mice). Statistical analyses were carried out using Wilcoxon  
378 matched pairs, signed-rank non-parametric tests.

379 For NeuO dye-labelled cell body density quantifications, data were analyzed from the first  
380 75  $\mu\text{m}$  of cortex deep to the pial surface of both heterotopic and control regions in layer I. Equal-  
381 sized volumes (50  $\mu\text{m}^3$ ) were randomly selected from the superficial cortical z-stacks captured  
382 from both heterotopic and control regions. The number of NeuO<sup>+</sup> cell bodies was manually  
383 counted in each volume. Average NeuO<sup>+</sup> cell body densities were then determined for  
384 the heterotopic and control region of each mouse ( $n = 6$  mice). Statistical analyses were  
385 performed using Wilcoxon matched pairs, signed-rank non-parametric tests.

386 For quantification of neuronal calcium dynamics in heterotopia vs. adjacent non-injected  
387 cortical areas, we used the two-photon microscope to capture 150 X 150  $\mu\text{m}$  field of view  
388 (FOV) time lapse images from both layer I heterotopia and non-injected ipsilateral layer  
389 II/III regions. Time lapse imaging (512 X 512 pixel resolution; 2Hz) was performed in awake,  
390 head-fixed mice during a 2-hour time window that started 4 hours after their arousal from cranial  
391 window surgical anesthesia. For heterotopic regions, FOVs were randomly selected from within  
392 the first 75  $\mu\text{m}$  below the cortical surface in layer I. For layer II/III regions, FOVs were randomly  
393 selected from between 120 to 175  $\mu\text{m}$  below the cortical surface. Six to eight separate FOVs  
394 (exactly half from layer I heterotopia and half from ipsilateral layer II/III regions) were imaged in  
395 each mouse, with each FOV recorded for 120s per trial for three trials. The order in which FOVs  
396 were acquired from heterotopia and layer II/III regions was alternated between mice. Time series

397 analyses were performed using ImageJ/FIJI. Prior to quantifications, TurboReg plugin in  
398 ImageJ/FIJI was used to align all time series images in the XY plane.

399 To quantify GCaMP6f fluorescence changes in individual cells, ROIs were manually  
400 selected to encapsulate neuronal cell bodies. GCaMP6f<sup>+</sup> cell bodies that exhibited tdTomato  
401 labelling from the IUE procedure were excluded from all analyses. Approximately 10 - 25  
402 GCaMP6f<sup>+</sup> cells were analyzed in each FOV. Baseline GCaMP6f fluorescence intensity values  
403 (F) for each cell were defined in each trial as the average of the lowest 20% of the recorded values  
404 per trial, with fluctuations from this baseline denoted as  $\Delta F/F$ . A spike event was defined in each  
405 trial as a  $\Delta F/F > 0.5$ . Spike event frequencies were averaged across 3 trials for each cell in both  
406 layer I heterotopia and layer II/III regions for  $n = 7$  mice. Statistical analyses were performed using  
407 Wilcoxon matched pairs, signed-rank non-parametric tests.

408 For quantifications of the global synchronization index reflecting the relative coordination  
409 of GCaMP6f activity, analyses were performed using Fluorescence Single Neuron and Network  
410 Analysis Package (FluoroSNNAP)<sup>74</sup>. Briefly, this semi-automated software implements a  
411 correlation matrix-based algorithm<sup>74-76</sup> to compute the normalized global synchronization indices  
412 (ranging in value from 0 to 1) for time series calcium imaging data of neural populations. The  
413 highest value, 1, signifies entirely synchronized firing throughout an identified cluster of neurons,  
414 whereas 0 indicates the total absence of synchrony. Synchronization cluster analyses were  
415 performed using template-based calcium event detection parameters set to detection threshold =  
416 0.85, minimum size of synchronization clusters = 2, and surrogate resampling = 20. A cluster of  
417 neurons was defined as the GCaMP6f<sup>+</sup> cell population within one FOV. Global synchronization  
418 indices were averaged across three trials for each FOV in both layer I heterotopia and layer II/III  
419 regions for  $n = 7$  mice. Statistical analyses were performed using Wilcoxon matched pairs,  
420 signed-rank non-parametric tests.

421

422 *Tissue processing and immunohistochemistry*

423 At P30, mice were deeply anesthetized using ketamine and xylazine, and then perfused  
424 transcardially with 4% paraformaldehyde in phosphate buffered saline (PBS). Harvested brains  
425 were post-fixed overnight using the same solution at 4 °C, and then vibratome sectioned (coronal;  
426 75 µm thickness) for fixed tissue analysis.

427 To identify brain regions that had been injected as part of the IUE procedure, a  
428 fluorescence microscope was next used to examine the sections for visibly disrupted layer I  
429 regions showing transfected neurons and/or neuronal processes, similar to what has been  
430 previously described<sup>46</sup>. The disrupted regions often revealed cellular clusters  
431 containing eGFP<sup>+</sup> neurons that protruded past the pial surface, which were never observed in  
432 intact cortical regions or in non-injected mice. Sections containing visibly disrupted layer I cortical  
433 cytoarchitecture indicative of injection-associated trauma were then selected for further  
434 processing. Immunohistochemistry, performed as described below, was used to confirm the  
435 presence of layer I heterotopia at all identified IUE injection sites. Coronal sections from P0-  
436 injected mice were screened in a similar manner for injected areas, which were identified by virally  
437 transfected axonal fibers and neuronal cell bodies concentrated around visible needle tracts (data  
438 not shown).

439 Prior to immunostaining, all free-floating sections were heated to 95 °C for 30 minutes in  
440 50 mM sodium citrate buffer (0.05% Tween-20, pH 6.0) for antigen retrieval and elimination of  
441 endogenous eGFP expression. After rinsing the sections in PBS at room temperature, EdU  
442 labelling was next carried out in some experiments as specified by the Click-iT EdU Alexa Fluor-  
443 647 Imaging Kit protocol (Cat# C10340). Before proceeding to antibody staining, all tissues  
444 were pre-incubated for 1-2 hr in 0.1% Triton X-100 and 5% Normal Goat Serum (NGS;  
445 Jackson ImmunoResearch, Cat# 005-000-121) in PBS at room temperature. Slices were then  
446 incubated with primary antibody for 1.5 hrs - 2 days as needed in 0.1% Triton X-100 and 5% NGS  
447 in PBS at 4 °C. The primary antibodies used were: rabbit anti-NeuN (Abcam, Cat# ab177487,  
448 1:3000), mouse anti-NeuN (Abcam, Cat# ab104224, 1:1000), mouse anti- Myelin CNPase (clone

449 SMI 91, Biolegend, Cat# 836404, 1:1000), rabbit anti-Cux1 (Novus Biologicals, Cat# NBP2-  
450 13883, 1:100), mouse anti-Tle4 (E-10) Alexa Fluor 647 (Santa Cruz Biotechnology, Cat# sc-  
451 365406 AF647, 1:100), mouse anti- GAD-67 (EMD Millipore, Cat# MAB5406, 1:1000), rabbit anti-  
452 Iba1 (Wako, Cat# 019-19741, 1:600), mouse anti-Aldh111 (clone N103/39, NeuroMab, Cat# 75-  
453 140, 1:500), chicken anti-Neurofilament NF-H (EnCor, Cat# CPCA-NF-H, 1:500), chicken anti-  
454 GFP (Abcam, Cat# 13970, 1:500), and rabbit anti-Myelin Basic Protein (MBP; Abcam, Cat#  
455 40390, 1:1000). Following primary antibody incubation, slices were washed in PBS and then  
456 incubated with Alexa Fluor dye-conjugated secondary antibodies of the appropriate host species  
457 at 1:600 dilution in 0.1% Triton X-100 and 5% NGS in PBS for 1 - 2 days at 4 °C. After secondary  
458 antibody incubation, sections were washed again in PBS and incubated with 2.5 µg mL<sup>-1</sup> 4',6-  
459 diamidino-2-phenylindole (DAPI) in PBS for 15 min at room temperature to counterstain cell  
460 nuclei. Following an additional subsequent wash, stained sections were mounted with 25%  
461 mounting media solution (Dako Ultramount, Cat# S1964; diluted 1:4 in PBS) onto glass slides for  
462 imaging.

463

#### 464 *Fixed tissue imaging and quantification*

465 Images of stained sections were collected using a Leica SP5 upright confocal laser  
466 scanning microscope. Lower magnification views of analyzed sections for presentation were  
467 acquired using 10X and 20X Leica objectives. All fixed tissue images for quantification were  
468 captured through a 40X Leica water immersion objective. For immunohistochemical analyses of  
469 *in utero*-injected mice, 'heterotopia' were defined as the layer I cortical regions demarcated by  
470 ectopic NeuN<sup>+</sup> cell body clusters identified at IUE needle tract sites. For P0-injected mice,  
471 because the heterotopia associated with needle tracts were more variable in size, ranging from  
472 several cells to 350 µm in diameter (data not shown), data for these injected areas were obtained  
473 from 300 µm X 90 µm FOVs centered on visible needle tracts that were within the first 100 µm  
474 below the pial surface. Control, non-injected regions were specified on corresponding

475 contralateral cortices at similar mediolateral distances from the midline. Identical laser output and  
476 image acquisition configurations were used to capture images of both heterotopia and  
477 contralateral control regions throughout each immunostaining set.

478 All data for Aldh111, Iba1, CNPase, and GAD-67 cell density quantifications were acquired  
479 from the most superficial 100  $\mu\text{m}$  of cortical tissue of both heterotopic and contralateral  
480 homologous control regions in layer I. The number of cell bodies confirmed by DAPI labelling that  
481 were positive for each marker was manually counted in randomly selected volumes within z-  
482 stacks acquired from both regions. The volumes were kept at identical dimensions between  
483 heterotopia and contralateral control regions for each experiment. For GAD-67 immunostaining,  
484 the presence of neuronal cell bodies was also confirmed by NeuN labelling. Two coronal sections  
485 containing heterotopia were analyzed per animal, with each immunostaining set comprising  $n = 6$   
486 animals. Statistical analyses were performed using Wilcoxon matched pairs, signed-rank non-  
487 parametric tests.

488 Data for CNPase density quantifications were acquired from the most superficial 100  $\mu\text{m}$   
489 of cortical tissue in both heterotopia and contralateral control regions. CNPase intensity was  
490 assessed using an automated thresholding and binarization plugin in Image/FIJI (Robust  
491 Automatic Threshold parameters set to noise = 1, lambda = 2, min = 208) for equally-sized ROIs  
492 that were randomly selected from within heterotopic and contralateral control z-projections (15  
493  $\mu\text{m}$  thickness). CNPase density values for each section were determined by subtracting the  
494 automated measurements made in additional background regions from those made in assessed  
495 heterotopic and control regions. Two coronal sections containing heterotopia were analyzed per  
496 animal ( $n = 6$  animals). Statistical analyses were performed using Wilcoxon matched pairs,  
497 signed-rank non-parametric tests.

498 To examine the neuronal composition of the embryonically-induced heterotopia, coronal  
499 sections were stained for NeuN, DAPI and one of the other following stains: Cux1, Tle4,  
500 or EdU as indicated in the text. Data were acquired from within the most superficial 100  $\mu\text{m}$  of the

501 neocortex for layer I heterotopia, and across the entire cortical wall for contralateral homologous  
502 control regions. For quantification of layer I heterotopia, equally sized VOIs were randomly  
503 selected from within the first 100  $\mu\text{m}$  below the pial surface. For quantification of control regions  
504 on the contralateral hemisphere, the cortical wall was partitioned into 11 equal volume bins  
505 extending from the pial surface to white matter, with Bin1 encompassing layer 1 and Bin 11  
506 adjoining white matter at its lower boundary. For each heterotopic VOI and control bin, the 1)  
507 number of NeuN<sup>+</sup> cells and 2) proportion of NeuN<sup>+</sup> cells that were also Cux1, Tle4,  
508 or EdU positive was manually quantified in ImageJ. Cells were identified as EdU positive if >  
509 50% of their nuclear volume, defined by DAPI, was occupied by EdU. Two sections were  
510 analyzed per mouse, with sample sizes for each group denoted in the text and figure legends.

511 The sites of injection analyzed in this study were positioned in somatosensory cortices  
512 and immediately adjacent areas in both male and female mice. Given the minimal variation in the  
513 morphological appearances of needle tracts between male and female mice and across different  
514 cortical areas, we pooled together these variables in our analyses. No animal subjects or  
515 experimental data points were excluded from analysis, and the nature of our study did not require  
516 subject randomization or experimenter blinding. No statistical methods were used to predetermine  
517 sample sizes, although our sample sizes are comparable to those published and generally  
518 accepted in the field. GraphPad Prism 7 was utilized for all statistical analyses, and Wilcoxon  
519 matched pairs signed-rank non-parametric tests were used to determine statistical significance  
520 (declared for p-values below 0.05; two-tailed) because a normal distribution of differences  
521 between the paired data could not be assumed. Data are reported as mean  $\pm$  s.e.m., unless  
522 otherwise noted.

523 **REFERENCES**

524

525 1. Kaufmann WE, Galaburda AM. Cerebrocortical microdysgenesis in neurologically normal  
526 subjects: a histopathologic study. *Neurology*. 1989;39(2 Pt 1):238-244.

527 doi:10.1212/WNL.39.2.238

528 2. Kasper BS, Stefan H, Buchfelder M, Paulus W. Temporal Lobe Microdysgenesis in  
529 Epilepsy Versus Control Brains. *J Neuropathol Exp Neurol*. 1999;58(1):22-28.

530 doi:10.1097/00005072-199901000-00003

531 3. Meencke HJ, Veith G. Migration disturbances in epilepsy. *Epilepsy Res Suppl*. 1992;9:31-  
532 39; discussion 39-40. <http://www.ncbi.nlm.nih.gov/pubmed/1285910>.

533 4. Schulze KD, Braak H. Hirnwarzen. *Zeitschrift fur Mikroskopisch-Anatomische Forsch -*  
534 *Abteilung 2*. 1978;92(4):609-623.

535 5. Sisodiya SM. *Malformations of Cortical Development: Burdens and Insights from*  
536 *Important Causes of Human Epilepsy*. Vol 3. Lancet Publishing Group; 2004:29-38.

537 doi:10.1016/S1474-4422(03)00620-3

538 6. Barkovich AJ, Gressens P, Evrard P. Formation, maturation, and disorders of brain  
539 neocortex. *Am J Neuroradiol*. 1992;13(2):423-446.

540 <http://www.ncbi.nlm.nih.gov/pubmed/1566709>.

541 7. Galaburda AM, Kemper TL. Cytoarchitectonic abnormalities in developmental dyslexia: a  
542 case study. *Ann Neurol*. 1979;6(2):94-100. doi:10.1002/ana.410060203

543 8. Hardiman O, Burke T, Phillips J, et al. Microdysgenesis in resected temporal neocortex:  
544 incidence and clinical significance in focal epilepsy. *Neurology*. 1988;38(7):1041-1047.

545 doi:10.1212/wnl.38.7.1041



- 546 9. Palmini A, Andermann F, Olivier A, Tampieri D, Robitaille Y. Focal neuronal migration  
547 disorders and intractable partial epilepsy: Results of surgical treatment. *Ann Neurol.*  
548 1991;30(6):750-757. doi:10.1002/ana.410300603
- 549 10. Kakita A, Hayashi S, Moro F, et al. Bilateral periventricular nodular heterotopia due to  
550 filamin 1 gene mutation: Widespread glomeruloid microvascular anomaly and dysplastic  
551 cytoarchitecture in the cerebral cortex. *Acta Neuropathol.* 2002. doi:10.1007/s00401-002-  
552 0594-9
- 553 11. Farrell MA, DeRosa MJ, Curran JG, et al. Neuropathologic findings in cortical resections  
554 (including hemispherectomies) performed for the treatment of intractable childhood  
555 epilepsy. *Acta Neuropathol.* 1992;83(3):246-259.  
556 <http://www.ncbi.nlm.nih.gov/pubmed/1557956>.
- 557 12. Nordborg C, Eriksson S, Rydenhag B, Uvebrant P, Malmgren K. Microdysgenesis in  
558 surgical specimens from patients with epilepsy: occurrence and clinical correlations. *J*  
559 *Neurol Neurosurg Psychiatry.* 1999;67(4):521-524.  
560 <http://www.ncbi.nlm.nih.gov/pubmed/10486403>.
- 561 13. Lee KS, Schottler F, Collins JL, et al. A genetic animal model of human neocortical  
562 heterotopia associated with seizures. *J Neurosci.* 1997;17(16):6236-6242.  
563 doi:10.1523/jneurosci.17-16-06236.1997
- 564 14. Bai J, Ramos RL, Ackman JB, Thomas AM, Lee R V., LoTurco JJ. RNAi reveals  
565 doublecortin is required for radial migration in rat neocortex. *Nat Neurosci.*  
566 2003;6(12):1277-1283. doi:10.1038/nn1153
- 567 15. Rosen GD, Sherman GF, Richman JM, Stone L V., Galaburda AM. Induction of molecular  
568 layer ectopias by puncture wounds in newborn rats and mice. *Dev Brain Res.*  
569 1992;67(2):285-291. doi:10.1016/0165-3806(92)90229-P

- 570 16. Brunstrom JE, Gray-Swain MRR, Osborne PA, Pearlman AL. Neuronal Heterotopias in  
571 the Developing Cerebral Cortex Produced by Neurotrophin-4. *Neuron*. 1997;18(3):505-  
572 517. doi:10.1016/S0896-6273(00)81250-7
- 573 17. Riggs HE, McGrath JJ, Schwarz HP. Malformation of the adult brain (albino rat) resulting  
574 from prenatal irradiation. *J Neuropathol Exp Neurol*. 1956;15(4):432-447.  
575 doi:10.1097/00005072-195610000-00006
- 576 18. Sherman GF, Galaburda AM, Behan PO, Rosen GD. Neuroanatomical anomalies in  
577 autoimmune mice. *Acta Neuropathol*. 1987;74(3):239-242. doi:10.1007/BF00688187
- 578 19. Amano S, Ihara N, Uemura S, et al. Development of a Novel Rat Mutant with  
579 Spontaneous Limbic-Like Seizures. *Am J Pathol*. 1996;149(1):329–336.
- 580 20. Dvořák K, Feit J, Juránková Z. Experimentally induced focal microgyria and status  
581 verrucosus deformis in rats - Pathogenesis and interrelation histological and  
582 autoradiographical study. *Acta Neuropathol*. 1978;44(2):121-129.  
583 doi:10.1007/BF00691477
- 584 21. Ferrer I, Alcántara S, Catalá I, Zújar MJ. Experimentally induced laminar necrosis, status  
585 verrucosus, focal cortical dysplasia reminiscent of microgyria, and porencephaly in the  
586 rat. *Exp brain Res*. 1993;94(2):261-269. <http://www.ncbi.nlm.nih.gov/pubmed/8359242>.  
587 Accessed July 14, 2017.
- 588 22. Lo Turco J, Manent JB, Sidiqi F. New and improved tools for in utero electroporation  
589 studies of developing cerebral cortex. *Cereb Cortex*. 2009;19(Suppl. 1):i120-5.  
590 doi:10.1093/cercor/bhp033
- 591 23. Saito T, Nakatsuji N. Efficient Gene Transfer into the Embryonic Mouse Brain Using in  
592 Vivo Electroporation. *Dev Biol*. 2001;240(1):237-246. doi:10.1006/dbio.2001.0439

- 593 24. Tabata H, Nakajima K. Efficient in utero gene transfer system to the developing mouse  
594 brain using electroporation: Visualization of neuronal migration in the developing cortex.  
595 *Neuroscience*. 2001. doi:10.1016/S0306-4522(01)00016-1
- 596 25. Schain AJ, Hill RA, Grutzendler J. Label-free in vivo imaging of myelinated axons in  
597 health and disease with spectral confocal reflectance microscopy. *Nat Med*.  
598 2014;20(4):443-449. doi:10.1038/nm.3495
- 599 26. Hill RA, Li AM, Grutzendler J. Lifelong cortical myelin plasticity and age-related  
600 degeneration in the live mammalian brain. *Nat Neurosci*. 2018;21(May):1-13.  
601 doi:10.1038/s41593-018-0120-6
- 602 27. Hill RA, Grutzendler J. In vivo imaging of oligodendrocytes with sulforhodamine 101. *Nat*  
603 *Methods*. 2014;11(11):1081-1082. doi:10.1038/nmeth.3140
- 604 28. Jacob H. Die feinere Oberflächengestaltung der Hirnwindungen, die Hirnwarzenbildung  
605 und die Mikropolygyrie. *Zeitschrift für die gesamte Neurol und Psychiatr*. 1940;170:68-84.  
606 doi:10.1007/bf02869355
- 607 29. Morel F, Wildi E. Dysgénésie nodulaire disséminée de l'écorce frontale. *Rev Neurol*  
608 *(Paris)*. 1952;87(3):251-270.
- 609 30. Sherman GF, Stone JS, Press DM, Rosen GD, Galaburda AM. Abnormal architecture  
610 and connections disclosed by neurofilament staining in the cerebral cortex of autoimmune  
611 mice. *Brain Res*. 1990;529(1-2):202-207. doi:10.1016/0006-8993(90)90828-Y
- 612 31. Ramos RL, Smith PT, DeCola C, Tam D, Corzo O, Brumberg JC. Cytoarchitecture and  
613 Transcriptional Profiles of Neocortical Malformations in Inbred Mice. *Cereb Cortex*.  
614 2008;18(11):2614-2628. doi:10.1093/cercor/bhn019
- 615 32. Sherman GF, Galaburda AM, Geschwind N. Cortical anomalies in brains of New Zealand

- 616 mice: a neuropathologic model of dyslexia? *Proc Natl Acad Sci U S A*. 1985;82(23):8072-  
617 8074. doi:10.1073/pnas.82.23.8072
- 618 33. Ramos RL, Siu NY, Brunken WJ, et al. Cellular and axonal constituents of neocortical  
619 molecular layer heterotopia. *Dev Neurosci*. 2014;36(6):477-489. doi:10.1159/000365100
- 620 34. Er JC, Leong C, Teoh CL, et al. NeuO: a Fluorescent Chemical Probe for Live Neuron  
621 Labeling. *Angew Chemie Int Ed*. 2015;54(8):2442-2446. doi:10.1002/anie.201408614
- 622 35. Humphreys P, Kaufmann WE, Galaburda AM. Developmental dyslexia in women:  
623 neuropathological findings in three patients. *Ann Neurol*. 1990;28(6):727-738.  
624 doi:10.1002/ana.410280602
- 625 36. Galaburda AM, Sherman GF, Rosen GD, Aboitiz F, Geschwind N. Developmental  
626 dyslexia: Four consecutive patients with cortical anomalies. *Ann Neurol*. 1985;18(2):222-  
627 233. doi:10.1002/ana.410180210
- 628 37. Molyneaux BJ, Arlotta P, Fame RM, MacDonald JL, MacQuarrie KL, Macklis JD. Novel  
629 subtype-specific genes identify distinct subpopulations of callosal projection neurons. *J*  
630 *Neurosci*. 2009;29(39):12343-12354. doi:10.1523/jneurosci.6108-08.2009
- 631 38. Molyneaux BJ, Goff LA, Brettler AC, et al. DeCoN: Genome-wide Analysis of In Vivo  
632 Transcriptional Dynamics during Pyramidal Neuron Fate Selection in Neocortex. *Neuron*.  
633 2015;85(2):275-288. doi:https://doi.org/10.1016/j.neuron.2014.12.024
- 634 39. Sorensen SA, Bernard A, Menon V, et al. Correlated Gene Expression and Target  
635 Specificity Demonstrate Excitatory Projection Neuron Diversity. *Cereb Cortex*.  
636 2015;25(2):433-449. doi:10.1093/cercor/bht243
- 637 40. Gabel LA, LoTurco JJ. Electrophysiological and morphological characterization of  
638 neurons within neocortical ectopias. *J Neurophysiol*. 2001;85(2):495-505.

- 639           doi:10.1152/jn.2001.85.2.495
- 640   41.    Gabel LA. Layer I neocortical ectopia: Cellular organization and local cortical circuitry.  
641           *Brain Res.* 2011;1381:148-158. doi:10.1016/J.BRAINRES.2011.01.040
- 642   42.    Angevine JB, Sidman RL. Autoradiographic Study of Cell Migration during Histogenesis  
643           of Cerebral Cortex in the Mouse. *Nature.* 1961;192(4804):766-768.  
644           doi:10.1038/192766b0
- 645   43.    Raedler E, Raedler A. Autoradiographic study of early neurogenesis in rat neocortex.  
646           *Anat Embryol (Berl).* 1978;154(3):267-284. doi:10.1007/bf00345657
- 647   44.    Hill RA, Damisah EC, Chen F, Kwan AC, Grutzendler J. Targeted two-photon chemical  
648           apoptotic ablation of defined cell types in vivo. *Nat Commun.* 2017;8(May):1-15.  
649           doi:10.1038/ncomms15837
- 650   45.    Singh SC. Ectopic neurones in the hippocampus of the postnatal rat exposed to  
651           methylazoxymethanol during foetal development. *Acta Neuropathol.* 1977;40(2):111-116.  
652           doi:10.1007/bf00688698
- 653   46.    Rosen GD, Bai J, Wang Y, et al. Disruption of Neuronal Migration by RNAi of *Dyx1c1*  
654           Results in Neocortical and Hippocampal Malformations. *Cereb Cortex.* 2007;17(11):2562-  
655           2572. doi:10.1093/cercor/bhl162
- 656   47.    Bagnard D, Lohrum M, Uziel D, Püschel AW, Bolz J. Semaphorins act as attractive and  
657           repulsive guidance signals during the development of cortical projections. *Development.*  
658           1998;125(24):5043-5053. <http://www.ncbi.nlm.nih.gov/pubmed/9811588>.
- 659   48.    Richards LJ, Koester SE, Tuttle R, O'Leary DD. Directed growth of early cortical axons is  
660           influenced by a chemoattractant released from an intermediate target. *J Neurosci.*  
661           1997;17(7):2445-2458. <http://www.ncbi.nlm.nih.gov/pubmed/9065505>.

- 662 49. Métin C, Deléglise D, Serafini T, Kennedy TE, Tessier-Lavigne M. A role for netrin-1 in  
663 the guidance of cortical efferents. *Development*. 1997;124(24):5063-5074.  
664 [https://www.scopus.com/inward/record.uri?eid=2-s2.0-](https://www.scopus.com/inward/record.uri?eid=2-s2.0-0031441084&partnerID=40&md5=16c8fc81c15621923b5da3fd9e86e059)  
665 [0031441084&partnerID=40&md5=16c8fc81c15621923b5da3fd9e86e059](https://www.scopus.com/inward/record.uri?eid=2-s2.0-0031441084&partnerID=40&md5=16c8fc81c15621923b5da3fd9e86e059). Accessed  
666 September 23, 2019.
- 667 50. Polleux F, Giger RJ, Ginty DD, Kolodkin AL, Ghosh A. Patterning of cortical efferent  
668 projections by semaphorin-neuropilin interactions. *Science (80- )*. 1998;282(5395):1904-  
669 1906. doi:10.1126/science.282.5395.1904
- 670 51. Gao PP, Yue Y, Zhang JH, Cerretti DP, Levitt P, Zhou R. Regulation of thalamic neurite  
671 outgrowth by the Eph ligand ephrin-A5: implications in the development of thalamocortical  
672 projections. *Proc Natl Acad Sci U S A*. 1998;95(9):5329-5334.  
673 doi:10.1073/pnas.95.9.5329
- 674 52. Baudet M-L, Zivraj KH, Abreu-Goodger C, et al. miR-124 acts through CoREST to control  
675 onset of Sema3A sensitivity in navigating retinal growth cones. *Nat Neurosci*.  
676 2012;15(1):29-38. doi:10.1038/nn.2979
- 677 53. Shewan D, Dwivedy A, Anderson R, Holt CE. Age-related changes underlie switch in  
678 netrin-1 responsiveness as growth cones advance along visual pathway. *Nat Neurosci*.  
679 2002;5(10):955-962. doi:10.1038/nn919
- 680 54. Skaliora I, Singer W, Betz H, Püschel AW. Differential patterns of semaphorin expression  
681 in the developing rat brain. *Eur J Neurosci*. 1998;10(4):1215-1229. doi:10.1046/j.1460-  
682 9568.1998.00128.x
- 683 55. Sturrock RR. Myelination of the mouse corpus callosum. *Neuropathol Appl Neurobiol*.  
684 1980;6(6):415-420. doi:10.1111/j.1365-2990.1980.tb00219.x

- 685 56. Goebbels S, Wieser GL, Pieper A, et al. A neuronal PI(3,4,5)P3-dependent program of  
686 oligodendrocyte precursor recruitment and myelination. *Nat Neurosci.* 20(1):10-15.  
687 doi:10.1038/nn.4425
- 688 57. Tomassy GS, Berger DR, Chen H-HH, et al. Distinct Profiles of Myelin Distribution Along  
689 Single Axons of Pyramidal Neurons in the Neocortex. *Science (80- )*.  
690 2014;344(6181):319-324. doi:10.1126/science.1249766
- 691 58. Micheva KD, Wolman D, Mensh BD, et al. A large fraction of neocortical myelin  
692 ensheathes axons of local inhibitory neurons. *Elife.* 2016;5. doi:10.7554/eLife.15784
- 693 59. Ishii K, Kubo KI, Endo T, et al. Neuronal heterotopias affect the activities of distant brain  
694 areas and lead to behavioral deficits. *J Neurosci.* 2015. doi:10.1523/JNEUROSCI.3648-  
695 14.2015
- 696 60. Roper SN, Gilmore RL, Houser CR. Experimentally induced disorders of neuronal  
697 migration produce an increased propensity for electrographic seizures in rats. *Epilepsy*  
698 *Res.* 1995;21(3):205-219. doi:10.1016/0920-1211(95)00027-8
- 699 61. Nieto M, Monuki ES, Tang H, et al. Expression of Cux-1 and Cux-2 in the subventricular  
700 zone and upper layers II-IV of the cerebral cortex. *J Comp Neurol.* 2004;479(2):168-180.  
701 doi:10.1002/cne.20322
- 702 62. Chmielowska J, Stewart MG, Bourne RC. gamma-Aminobutyric acid (GABA)  
703 immunoreactivity in mouse and rat first somatosensory (SI) cortex: description and  
704 comparison. *Brain Res.* 1988;439(1-2):155-168. doi:10.1016/0006-8993(88)91472-2
- 705 63. Meyer HS, Schwarz D, Wimmer VC, et al. Inhibitory interneurons in a cortical column  
706 form hot zones of inhibition in layers 2 and 5A. *Proc Natl Acad Sci.* 2011;108(40):16807-  
707 16812. doi:10.1073/pnas.1113648108

- 708 64. Gabel LA, LoTurco JJ. Layer I Ectopias and Increased Excitability in Murine Neocortex. *J*  
709 *Neurophysiol.* 2002;87(5):2471-2479. doi:10.1152/jn.2002.87.5.2471
- 710 65. Manent JB, Wang Y, Chang Y, Paramasivam M, LoTurco JJ. Dcx reexpression reduces  
711 subcortical band heterotopia and seizure threshold in an animal model of neuronal  
712 migration disorder. *Nat Med.* 2009;15(1):84-90. doi:10.1038/nm.1897
- 713 66. Chevassus-Au-Louis N, Rafiki A, Jorquera I, Ben-Ari Y, Represa A. Neocortex in the  
714 hippocampus: An anatomical and functional study of CA1 heterotopias after prenatal  
715 treatment with methylazoxymethanol in rats. *J Comp Neurol.* 1998;394(4):520-536.  
716 doi:10.1002/(SICI)1096-9861(19980518)394:4<520::AID-CNE9>3.0.CO;2-3
- 717 67. Jenner AR, Galaburda AM, Sherman GF. Connectivity of ectopic neurons in the  
718 molecular layer of the somatosensory cortex in autoimmune mice. 2000;10(10):1005-  
719 1013.
- 720 68. Chevassus-Au-Louis N, Congar P, Represa A, Ben-Ari Y, Gaïarsa JL. Neuronal migration  
721 disorders: heterotopic neocortical neurons in CA1 provide a bridge between the  
722 hippocampus and the neocortex. *Proc Natl Acad Sci U S A.* 1998;95(17):10263-10268.  
723 doi:10.1073/PNAS.95.17.10263
- 724 69. Schottler F, Fabiato H, Leland JM, et al. Normotopic and heterotopic cortical  
725 representations of mystacial vibrissae in rats with subcortical band heterotopia.  
726 *Neuroscience.* 2001. doi:10.1016/S0306-4522(01)00395-5
- 727 70. Romero DM, Bahi-Buisson N, Francis F. Genetics and mechanisms leading to human  
728 cortical malformations. *Semin Cell Dev Biol.* 2018;76:33-75.  
729 doi:10.1016/J.SEMCDB.2017.09.031
- 730 71. Saito T. In vivo electroporation in the embryonic mouse central nervous system. *Nat*



- 731            *Protoc.* 2006;1(3):1552-1558. doi:10.1038/nprot.2006.276
- 732    72.    Kim J-Y, Ash RT, Ceballos-Diaz C, et al. Viral transduction of the neonatal brain delivers  
733            controllable genetic mosaicism for visualising and manipulating neuronal circuits in vivo.  
734            *Eur J Neurosci.* 2013;37(8):1203-1220. doi:10.1111/ejn.12126
- 735    73.    Phifer CB, Terry LM. Use of hypothermia for general anesthesia in preweanling rodents.  
736            *Physiol Behav.* 1986;38(6):887-890.
- 737    74.    Patel TP, Man K, Firestein BL, Meaney DF. Automated quantification of neuronal  
738            networks and single-cell calcium dynamics using calcium imaging. *J Neurosci Methods.*  
739            2015;243:26-38. doi:10.1016/j.jneumeth.2015.01.020
- 740    75.    Li X, Ouyang G, Usami A, Ikegaya Y, Sik A. Scale-Free Topology of the CA3  
741            Hippocampal Network: A Novel Method to Analyze Functional Neuronal Assemblies.  
742            *Biophys J.* 2010;98(9):1733-1741. doi:10.1016/J.BPJ.2010.01.013
- 743    76.    Li X, Cui D, Jiruska P, Fox JE, Yao X, Jefferys JGR. Synchronization Measurement of  
744            Multiple Neuronal Populations. *J Neurophysiol.* 2007;98(6):3341-3348.  
745            doi:10.1152/jn.00977.2007

746 **ACKNOWLEDGEMENTS**

747

748 We thank F. Chen for his guidance *in utero* electroporation techniques. This study was funded by  
749 grants from the U.S. National Institutes of Health (R01NS089734, R21NS088411 and  
750 R21NS087511 to J.G.; R00NS099469 and P20GM113132 to R.A.H.; T32NS007224  
751 and T32GM007205 to A.M.L.), Donors Cure Foundation (New Vision Award to R.A.H.), and  
752 National Multiple Sclerosis Society (#RR-1602-07686 to J.G.).

753

754 **AUTHOR CONTRIBUTIONS**

755

756 A.M.L. and J.G. conceived the initial project. A.M.L., R.A.H, and J.G. designed the experiments.  
757 A.M.L. performed all experiments, analyzed the data, and prepared the figures. A.M.L., R.A.H.  
758 and J.G. wrote the manuscript.

759

760 **COMPETING INTERESTS**

761

762 The authors declare no competing interests.

763

764 **MATERIALS & CORRESPONDENCE**

765

766 Correspondence and requests for materials should be addressed to J.G. (email:  
767 [jaime.grutzendler@yale.edu](mailto:jaime.grutzendler@yale.edu)) and R.A.H. (email: [robert.hill@dartmouth.edu](mailto:robert.hill@dartmouth.edu)).

768 **Fig. 1. Targeted induction and high-resolution imaging of layer I heterotopia in the live**  
769 **mouse. a**, Diagram showing a single neocortical heterotopion induced at the needle tract  
770 during *in utero* electroporation (IUE) at embryonic day (E15). The site is relocated postnatally for  
771 detailed investigation of the resulting layer I heterotopion by intravital imaging. **b**, Quantification  
772 showing significantly increased neuron density ( $n = 6$  mice) within heterotopia compared to  
773 ipsilateral neighboring layer I control regions (Wilcoxon non-parametric, matched-pairs signed  
774 rank test  $*P < 0.05$ ). Each point represents the heterotopion or control region from one animal.  
775 Horizontal lines and error bars denote mean and s.e.m, respectively. Descriptive statistics are  
776 indicated in Supplementary File 1. **c**, *In vivo* fluorescence images of a representative layer  
777 I heterotopion (right) and neighboring ipsilateral, non-injected control region in a P30 mouse (left).  
778 Notice the tightly packed cluster of fluorescently labelled neuronal cell bodies (NeuO; green).  
779 Neurons within the heterotopion can also be readily labeled during the electroporation procedure  
780 and visualized *in vivo* (tdTomato; red). In contrast, neurons in more sparsely populated control  
781 layer I regions never demonstrate IUE-mediated labelling (left column). HTP, heterotopia. Scale  
782 bars, 50  $\mu\text{m}$  (**c**).

783 **Fig. 2. Heterotopia contain an abundance of hypermyelinated axons. a**, *In vivo* combined  
784 fluorescence and label-free SCoRe myelin images of a representative induced heterotopion (right;  
785 same as in Figure 1c) and neighboring ipsilateral, non-injected control region (left) in a P30  
786 mouse. The tightly packed heterotopic neuronal cell bodies (NeuO) are surrounded by a  
787 circumscribed abundance of aberrantly projecting, myelinated axon segments (SCoRe). **b,c** Low  
788 magnification (**b**) and high magnification (**c**) immunostainings of an induced heterotopion and its  
789 corresponding contralateral control region taken from a P30 mouse, showing increased  
790 oligodendrocyte CNPase expression associated with the heterotopion, as defined by the  
791 ectopically positioned NeuN<sup>+</sup> neuronal cell bodies in layer I (**b**, white arrowheads). Notice the  
792 more horizontal orientation of myelin segments located closer to the pial surface of the  
793 heterotopion (**c**, blue arrowhead). Deeper myelin segments, in contrast, are organized in a more  
794 radial fashion (**c**, blue arrow) and fasciculate into densely myelinated fiber bundles that project  
795 through lower cortical layers (**b**, white arrow). **d**, Quantifications of SCoRe *in vivo* ( $n = 8$  mice;  
796 top) and CNPase in fixed tissue ( $n = 6$  mice; middle and bottom), showing increased myelination  
797 and oligodendrocyte cell body densities in induced layer I heterotopia compared to non-injected  
798 contralateral control regions. Each point represents the layer I heterotopion or control region from  
799 one animal. Horizontal lines and error bars denote mean and s.e.m, respectively (Wilcoxon  
800 matched-pairs signed rank non-parametric test; \*P < 0.05, \*\*P < 0.01). HTP, Heterotopia.  
801 Descriptive statistics are given in Supplementary File 1. Scale bars, 50  $\mu\text{m}$  (**a**), 200  $\mu\text{m}$  in (**b**), and  
802 50  $\mu\text{m}$  (**c**).

803 **Fig. 3. Myelinated and unmyelinated axons follow aberrantly looping and concentric paths.**  
804 **a-d**, Intravital imaging of a nest-like heterotopion at P30 in **(a)** using SCoRe and confocal  
805 fluorescence microscopy showing **b**, labelled neuronal cell bodies (tdTomato; green) dispersed  
806 throughout the aberrantly oriented myelinated fibers (SCoRe; magenta) and **c**, winding axonal  
807 projections that occasionally fasciculate into bundles at the edges of the heterotopion. **d**,  
808 Myelinated (arrowheads) and unmyelinated axon segments (arrows) are observed within the  
809 heterotopion. **e-g**, Low magnification (**e**) and high magnification (**f**, **g**) immunostainings of an  
810 embryonically-induced heterotopion, confirming the presence of both myelinated (**g**, arrowhead)  
811 and unmyelinated (**f**, arrow) axon segments (**f** and **g** show high magnification images of areas  
812 indicated by arrow and arrowhead in **e**, respectively). NF-H, neurofilament heavy chain. Images  
813 are representative of experiments performed in at least six animals. Scale bars, 100  $\mu\text{m}$  (**a**), 15  
814  $\mu\text{m}$  (**b-d**), 100  $\mu\text{m}$  (**e**), and 25  $\mu\text{m}$  (**f**, **g**).

815 **Fig. 4. Heterotopia can be induced at various embryonic stages of corticogenesis. a, *In vivo***  
816 NeuO dye neuron staining (green) and SCoRe myelin imaging (magenta) of P30 mouse cortices  
817 that were previously electroporated at E14 (left column), E15 (middle column), and E17 (right  
818 column), all showing similar aberrantly projecting axons and hypermyelination encircling ectopic  
819 neuron clusters. Images are representative of observations made in at least three animals per  
820 IUE-injected age group. Scale bars, 100  $\mu$ m.

821 **Fig. 5. Postnatally-induced heterotopia do not develop aberrant axons or myelination. a,**  
822 Confocal images of an immunolabelled coronal section from P30 mouse cortex, showing no  
823 changes in myelination (CNPase) or axonal pathfinding (NF-H) associated with a P0-induced  
824 heterotopion (NeuN; arrowheads), compared to its contralateral control region (left). **b,** In contrast,  
825 neuronal heterotopia induced *in utero* at E15 (NeuN; arrowheads) show dramatic changes in local  
826 layer I myelin (CNPase) expression and patterning. **c,** Quantifications of CNPase expression,  
827 showing no significant differences in the myelin or oligodendrocyte cell body densities ( $n = 6$   
828 animals) between postnatally-induced heterotopia and control regions. Each point represents the  
829 P0-induced layer I heterotopion or control region from one animal, with horizontal lines and error  
830 bars denoting mean and s.e.m, respectively. Wilcoxon matched-pairs signed rank non-parametric  
831 test was used to determine significance; NS, no significance. NF-H, neurofilament heavy chain.  
832 Descriptive statistics are given in Supplementary File 1. Scale bars, 100  $\mu\text{m}$  (**a, b**).

833 **Fig. 6. Astrocytes and microglia retain a normal density despite aberrant axonal and myelin**  
834 **distribution. a-b**, Low magnification (**a**) and high magnification (**b**) images of Aldh111-positive  
835 astrocytes in P30 mouse cortex, showing similar cell densities in layer I heterotopia (right images,  
836 arrowheads) compared to corresponding contralateral control regions (left images). **c**,  
837 Quantifications using P30 mouse forebrain tissue showing no significant difference in astrocyte  
838 cell density (Wilcoxon non-parametric matched-pairs, signed rank test,  $n = 6$  animals; ns, no  
839 significance). **d-e** Low magnification (**d**) and high magnification (**e**) images of Iba1-  
840 immunolabelled P30 mouse forebrain, showing no difference in microglia cell densities between  
841 heterotopia (right images, arrowheads) and contralateral control regions (left images). **f**,  
842 Quantifications using P30 mouse forebrain tissue demonstrating no significant difference in  
843 microglia cell density between layer I heterotopia and corresponding contralateral control regions  
844 (Wilcoxon matched-pairs, signed rank non-parametric test,  $n = 6$  animals; ns, no significance).  
845 For graphs in (**c**) and (**f**), each point represents an embryonically-induced layer I heterotopia or  
846 control region from one animal, with horizontal lines and accompanying error bars denoting mean  
847 and s.e.m., respectively. Descriptive statistics are given in Supplementary File 1. HTP,  
848 heterotopia. Scale bars, 100  $\mu\text{m}$  (**a**), 20  $\mu\text{m}$  (**b**), 100  $\mu\text{m}$  (**d**), and 20  $\mu\text{m}$  (**e**).



849 **Fig. 7. Heterotopia contain a mixed population of excitatory and inhibitory neurons. a,**  
850 Approach for quantifying layer-specific neuronal marker expression (symbolized by blue and  
851 green dots) in layer I heterotopia and across corresponding contralateral control cortices in P30  
852 mice. Contralateral control cortices are subdivided into 11 equally-sized bins that together span  
853 the entire thickness of the cortex. **b-c** Both Cux1<sup>+</sup> (**b**, cyan) and Tle4<sup>+</sup> (**c**, green) neuronal cell  
854 bodies occur within layer I heterotopia (right images, arrowheads). In contralateral control regions  
855 (left images), Cux1 is concentrated in more superficial cortical areas corresponding to layers II/III,  
856 whereas deeper areas corresponding to layers V/VI encapsulate the majority of Tle4 labelling.  
857 Quantifications (far right) show the percentages of NeuN<sup>+</sup> cell bodies that also express Cux1 (top)  
858 or Tle4 (bottom) within heterotopia and across corresponding contralateral control bins. Each dot  
859 corresponds to the layer I heterotopion or control bin of a single animal, with all dots of the same  
860 color belonging to the same animal ( $n = 4$  animals for Cux1;  $n = 5$  animals for Tle4). The black  
861 line denotes the mean. WM, white matter. **d,e** Low (**d**) and high (**e**) magnification z-projections of  
862 GAD-67-immunostained P30 mouse forebrain, showing the presence of GAD-67-labelled cells  
863 and puncta in both layer I heterotopia (right images, arrowheads) and corresponding contralateral  
864 control regions (left images). **f**, Quantifications from P30 mouse tissue showing no significant  
865 difference in GAD-67<sup>+</sup> neuronal cell density between layer I heterotopia and contralateral control  
866 regions (Wilcoxon matched-pairs, signed rank non-parametric test,  $n = 6$  animals; ns, no  
867 significance). Each point represents the layer I heterotopion or contralateral control region from  
868 one animal, with horizontal lines and accompanying error bars denoting mean and s.e.m.,  
869 respectively. HTP, heterotopia. Descriptive statistics are given in Supplementary File 1. Scale  
870 bars 200  $\mu\text{m}$  (**b, c**), 100  $\mu\text{m}$  (**d**), and 10  $\mu\text{m}$  (**e**).

871 **Fig. 8. Heterotopic neurons display calcium dynamics similar to adjacent layer II/III**  
872 **neurons and respond to sensorimotor input. a-c** *In vivo* time lapse imaging of layer I  
873 heterotopic neurons expressing the calcium sensor GCaMP6f in an awake, head-fixed mouse.  
874 Dotted lines in (a) indicate an analyzed heterotopic region that is displayed in (b). c, Example  
875 traces of spontaneous neuronal calcium transients from layer I heterotopic (right) and ipsilateral  
876 layer II/III non-heterotopic (left) regions displayed in (b). d, Quantifications showing no significant  
877 difference in calcium spike event frequency (Hz), variance (s.d.) or global synchronization index  
878 between layer I heterotopia and adjacent layer II/III non-heterotopic regions. Each dot  
879 corresponds to the average value for each measure in a layer I heterotopia or non-heterotopic  
880 layer II/III region from a single animal. Data represent 493 layer I heterotopic neurons and 594  
881 layer II/III neurons from  $n = 7$  mice. Wilcoxon matched-pairs, signed rank non-parametric test was  
882 used for all three quantifications; ns, no significance; HTP, heterotopia. Descriptive statistics are  
883 given in Supplementary File 1. e, *In vivo* z-projection of the same GCaMP6f-transfected  
884 heterotopia displayed in (a), captured at a different depth, showing neurons that were imaged  
885 during brief applications of whisker stimulation. f, Baseline calcium dynamics (left column) and  
886 calcium fluctuations (middle and right columns) of individual heterotopic neurons in response to  
887 stimuli (denoted by solid blue line in two trials) obtained from the awake, head-fixed mouse  
888 imaged in (e). Experimental observations in (e, f) were replicated in three mice. All data and  
889 images from (a-f) were obtained from P50-60 mice with heterotopia induced at E15, and virally  
890 transfected with AAV-GCaMP6f at P21-P30. Some neuronal cell body and axonal labelling by  
891 pCAG-TdTomato (red) is the result of E15 IUE-mediated transfection. Scale bars, 50  $\mu\text{m}$  (a), 25  
892  $\mu\text{m}$  (b), and 50  $\mu\text{m}$  (e).

893 **Figure 3–figure supplement 1. Myelinated axons project aberrantly around heterotopic**  
894 **cells. a**, High resolution immunostaining showing the winding trajectories followed by CNPase<sup>+</sup>  
895 fibers (bottom, blue arrow) within a layer I heterotopion (NeuN; white arrowheads) in a P30 mouse  
896 coronal section. The aberrantly-projecting myelinated fiber bundles are absent from immediately  
897 adjacent non-heterotopic cortex and corresponding contralateral control regions (top row).  
898 Images are representative of experiments performed in at least six animals. Scale bars, 100 μm.

899 **Figure 2–figure supplement 1. Disrupted myelin patterning and axonal pathfinding occurs**  
900 **in deeper cortical layers. a**, Myelinated fibers (MBP, cyan) accumulate in thick radially oriented  
901 cords (white arrow) beneath a layer I heterotopion (NeuN; arrowheads) in an immunostained P30  
902 mouse forebrain coronal section. **b-c**, Confocal images of a different coronal section from the  
903 same heterotopion in **(a)**, revealing similar aberrant myelin and axon accumulations as identified  
904 by oligodendrocyte CNPase (green) and axonal NF-H (red) immunostaining, respectively. A  
905 higher magnification view of the densely packed myelinated axons fasciculating underneath  
906 the heterotopion (**b**, blue arrow) is shown in **(c)**. Images in **(b)** and **(c)** are of same section shown  
907 in Figure 3e. Images are representative of fixed tissue experiments performed in at least three  
908 mice. Scale bars, 200  $\mu\text{m}$  (**a**, **b**), and 20  $\mu\text{m}$  (**c**).

909 **Figure 7–figure supplement 1. Heterotopic neurons express both deep and superficial**  
910 **cortical layer markers. a-b**, Additional fixed tissue images captured from the heterotopia  
911 displayed in Figures 7b and c, confirming the presence of Cux1<sup>+</sup> (**a**, cyan) and Tle4<sup>+</sup> (**b**, green)  
912 neuronal cell bodies within the representative heterotopia (bottom images, arrowheads). In  
913 corresponding contralateral control regions (top images), Cux1 (left) largely concentrates in  
914 superficial cortical layers whereas Tle4 (right) tends to localize toward deeper cortical layers. **c-**  
915 **d**, Quantifications showing the densities of Cux1<sup>+</sup> (**c**,  $n = 4$  animals), Tle4<sup>+</sup> (**d**,  $n = 5$  animals), and  
916 NeuN<sup>+</sup> (**c** and **d**, right) cells in heterotopia and across corresponding contralateral control regions  
917 of P30 mice. Each dot corresponds to the layer I heterotopion or control bin of a single animal,  
918 with all dots of the same color belonging to the same animal. The black line denotes the mean.  
919 Images are representative of experiments performed in at least four animals. WM, white matter;  
920 HTP, heterotopia. Scale bars, 200  $\mu\text{m}$ .

921 **Figure 7–figure supplement 2. Birth-dating of heterotopic neurons. a**, Diagram of the pulse  
922 labelling strategy for birthdating heterotopic cortical neurons. Dividing cells are labelled by a single  
923 EdU injection at E11.5, with heterotopia induced at E15. Mice are sacrificed at P30 for analysis.  
924 **b**, Low magnification images showing the EdU<sup>+</sup> neurons incorporated in a layer I heterotopion  
925 (right, arrowheads) of a P30 mouse. In corresponding contralateral control cortex (left column),  
926 EdU expression is predominantly concentrated in deeper cortical layers. **c**, Quantifications  
927 showing the percentages of NeuN<sup>+</sup> cells that also express EdU (top), EdU<sup>+</sup>NeuN<sup>+</sup> cell body  
928 densities (middle), and NeuN<sup>+</sup> cell body densities (bottom) in layer I heterotopia and across  
929 corresponding contralateral control cortices of P30 mice. Each dot corresponds to the layer I  
930 heterotopion or control bin of a single animal, with all dots of the same color belonging to the  
931 same animal ( $n = 4$  animals total). Images are representative of the observations made in each  
932 mouse brain. The black line denotes the mean. WM, white matter; HTP, heterotopia. Scale bars,  
933 200  $\mu\text{m}$ .

934 **Video 1. *In vivo* imaging of a layer I heterotopion and adjacent control area.** Confocal z-  
935 stacks of a heterotopion (right) and ipsilateral non-injected layer I control region (left) captured  
936 from a living P30 mouse using label-free SCoRe (magenta) and fluorescence microscopy,  
937 showing the aberrantly projecting myelinated axons and ectopic neurons located inside a layer I  
938 heterotopion induced at E15. Neuronal cell bodies and cerebral blood vessels are visualized using  
939 fluorescent neuronal dye NeuO (green) and Evans Blue (white), respectively. The density of the  
940 horizontally crisscrossing, aberrantly projecting fibers diminishes with increasing cortical depth  
941 (indicated at bottom left).

942 **Video 2. Layer I heterotopia and adjacent layer II/III regions display highly variable**  
943 **spontaneous neuronal calcium transients.** Representative *in vivo* two-photon time-lapse  
944 recordings of GCaMP6f-labelled neurons (green) within a layer I heterotopion (right) and an  
945 adjacent layer II/III cortical region (left) in an awake, head-fixed P55 mouse. Diverse patterns of  
946 spontaneous calcium transients are observed in neuronal cell bodies throughout both imaged  
947 regions. Note the absence of obvious epileptiform activity. Images were acquired at 2 Hz from an  
948 E15-induced layer I heterotopion. Some neuronal cell body and axonal labelling by pCAG-  
949 TdTomato (red) is the result of E15 IUE-mediated transfection.

950 **Video 3. Heterotopic neurons respond to sensory stimuli.** Two *in vivo* confocal time-lapse  
951 recording examples of GCaMP6f-labelled neurons within a layer I heterotopion before, during,  
952 and after the application of a brief whisker stimulus, administered one minute into each imaging  
953 session. The timing of the stimulus and accompanying movements are indicated by the white  
954 circle (positioned at the top left of the embedded video). Neuronal calcium changes are observed  
955 upon the application of each stimulus, indicating the responsiveness of the heterotopic neurons  
956 to sensorimotor input. Both recordings were obtained from P55 awake, head-fixed mice with layer  
957 I heterotopia that were induced at E15 and virally transfected using AAV-GCaMP6f at P21-P30.

958 **Supplementary Table 1.** Details for all statistical analyses, including sample sizes and p-values.



Figure 1

a

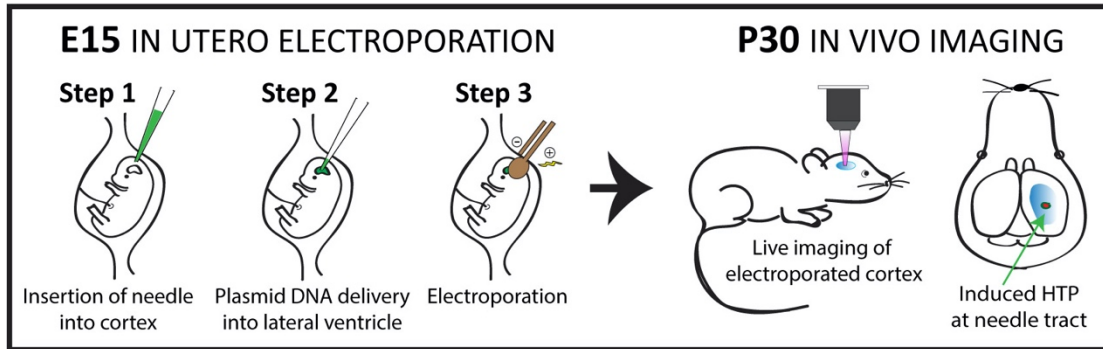

b

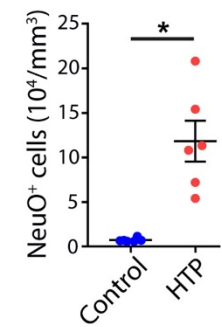

C

CONTROL

HETEROTOPIA

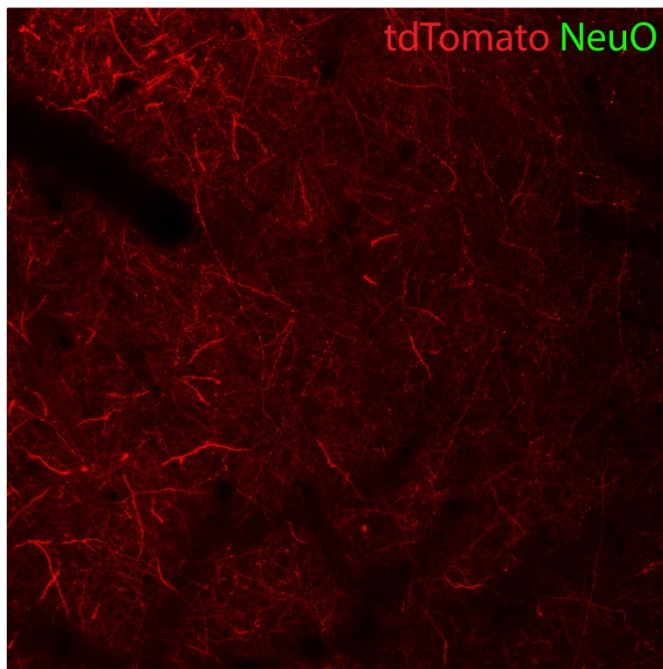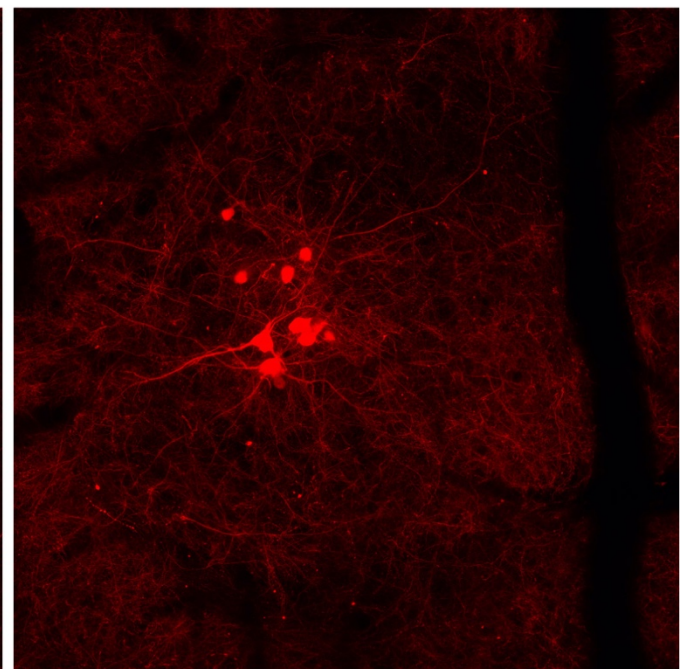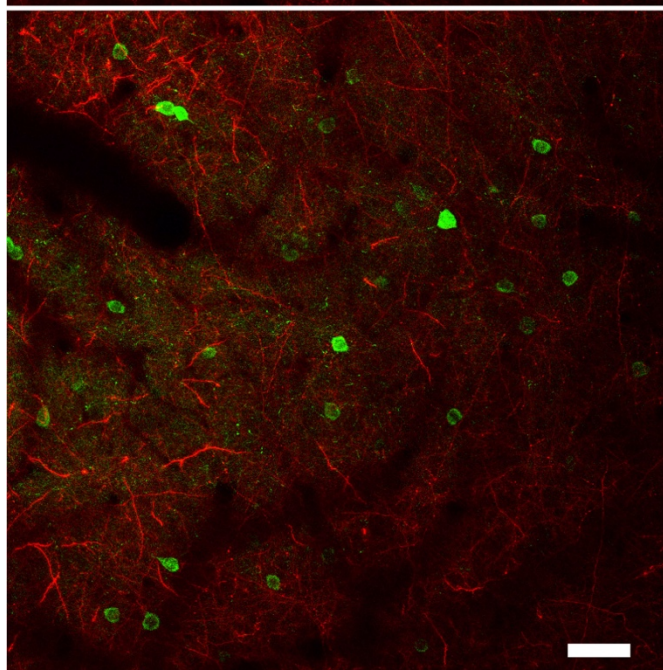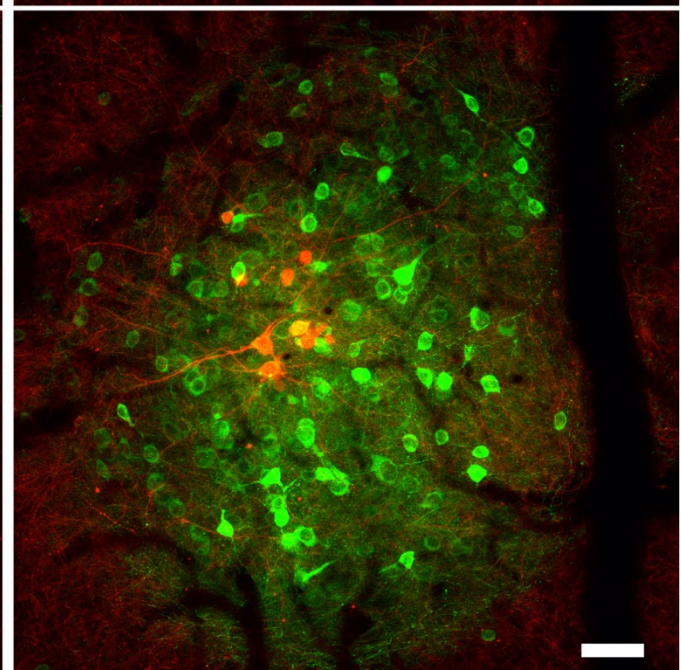

Figure 2

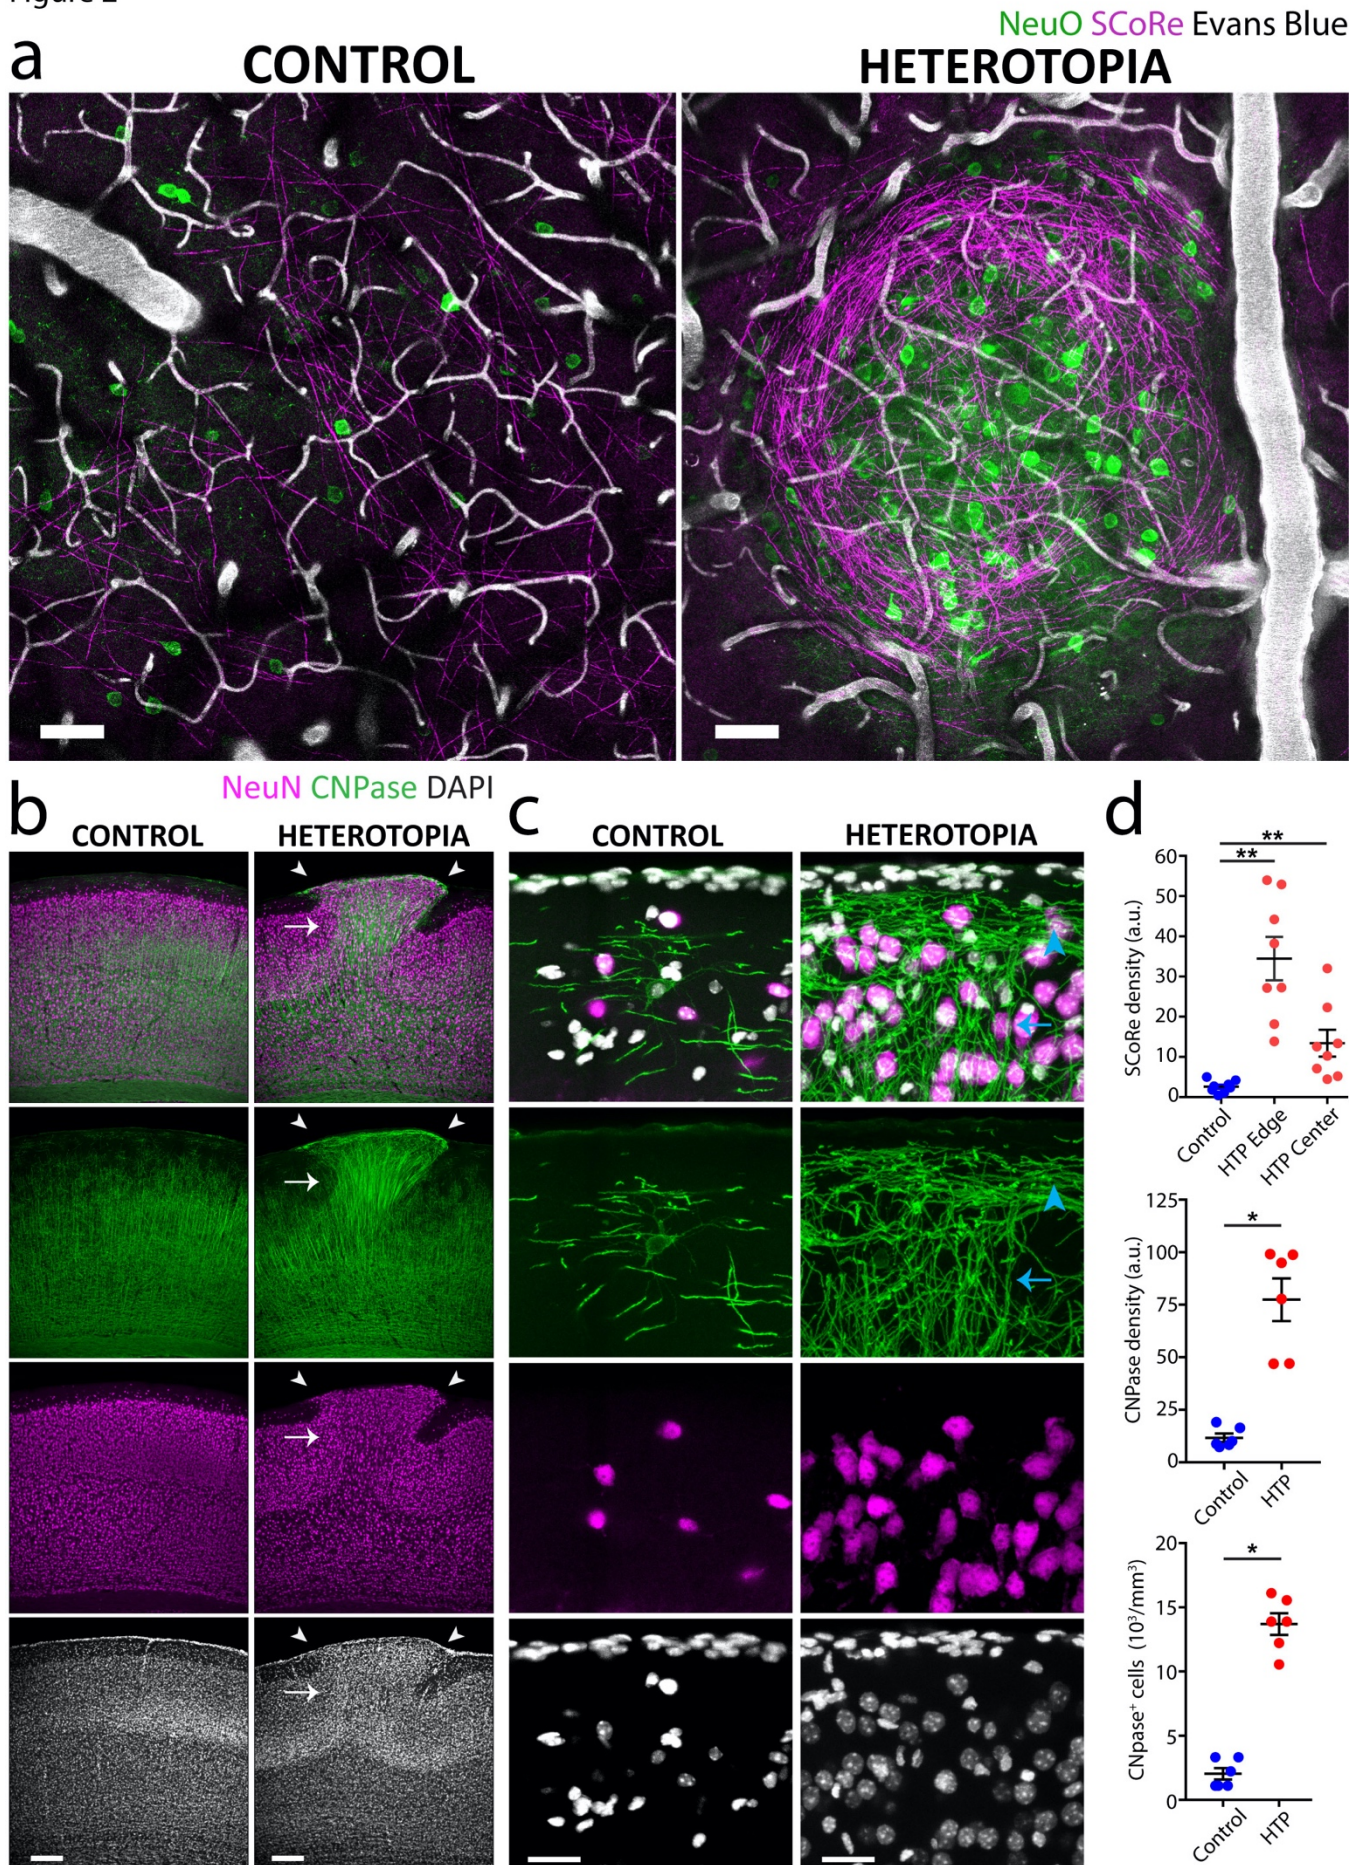

Figure 2 - figure supplement 1

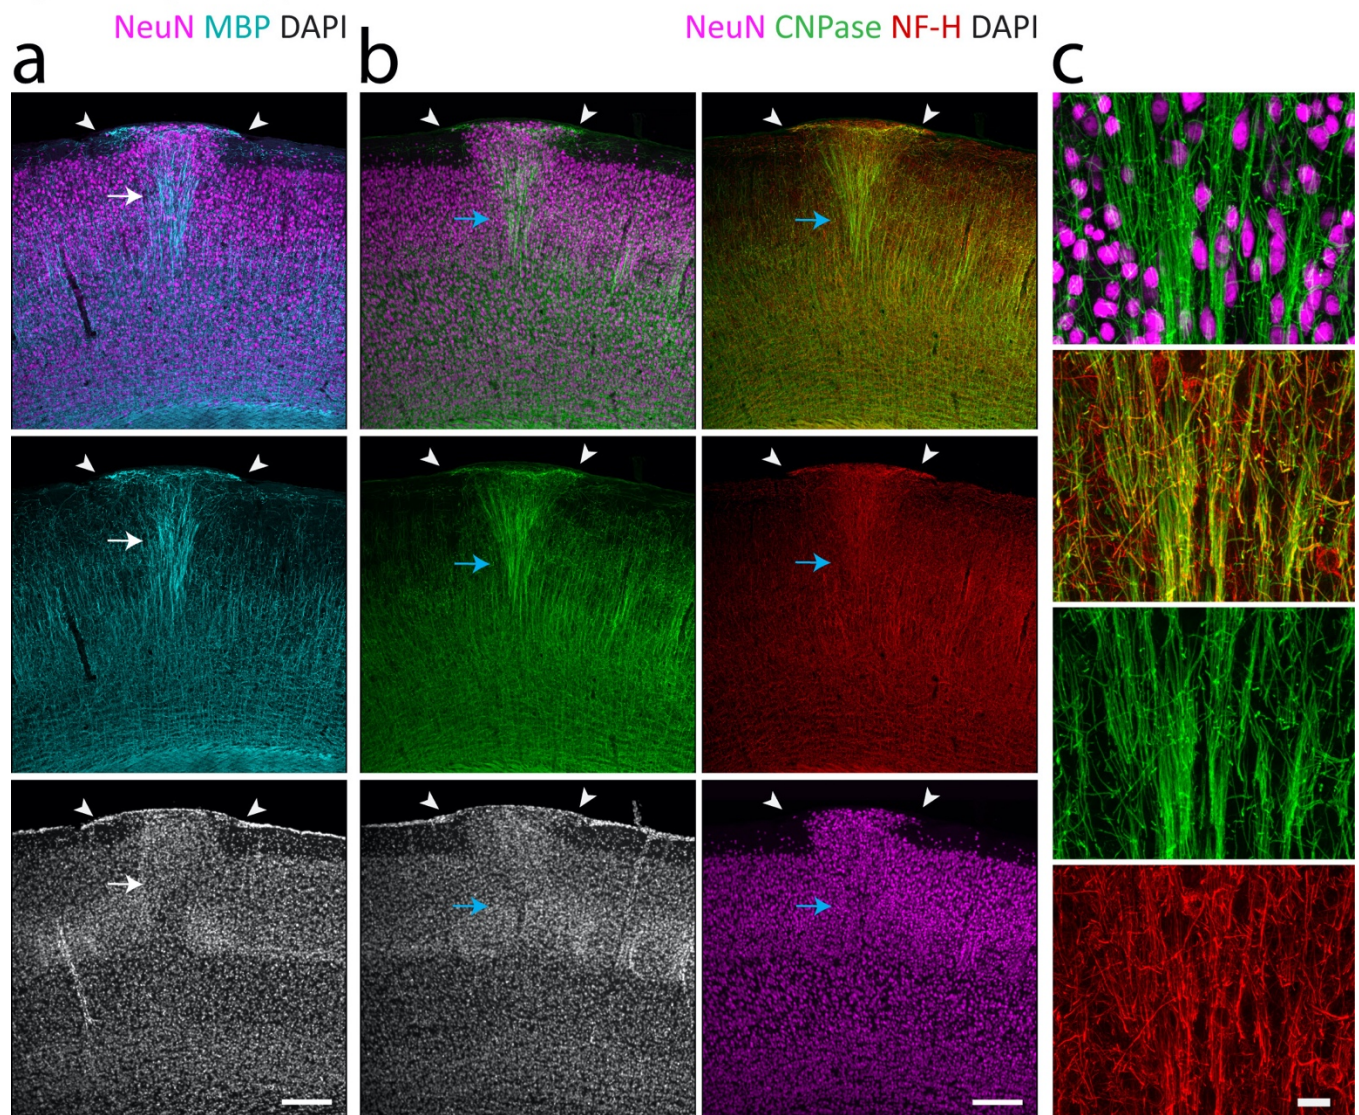

Figure 3

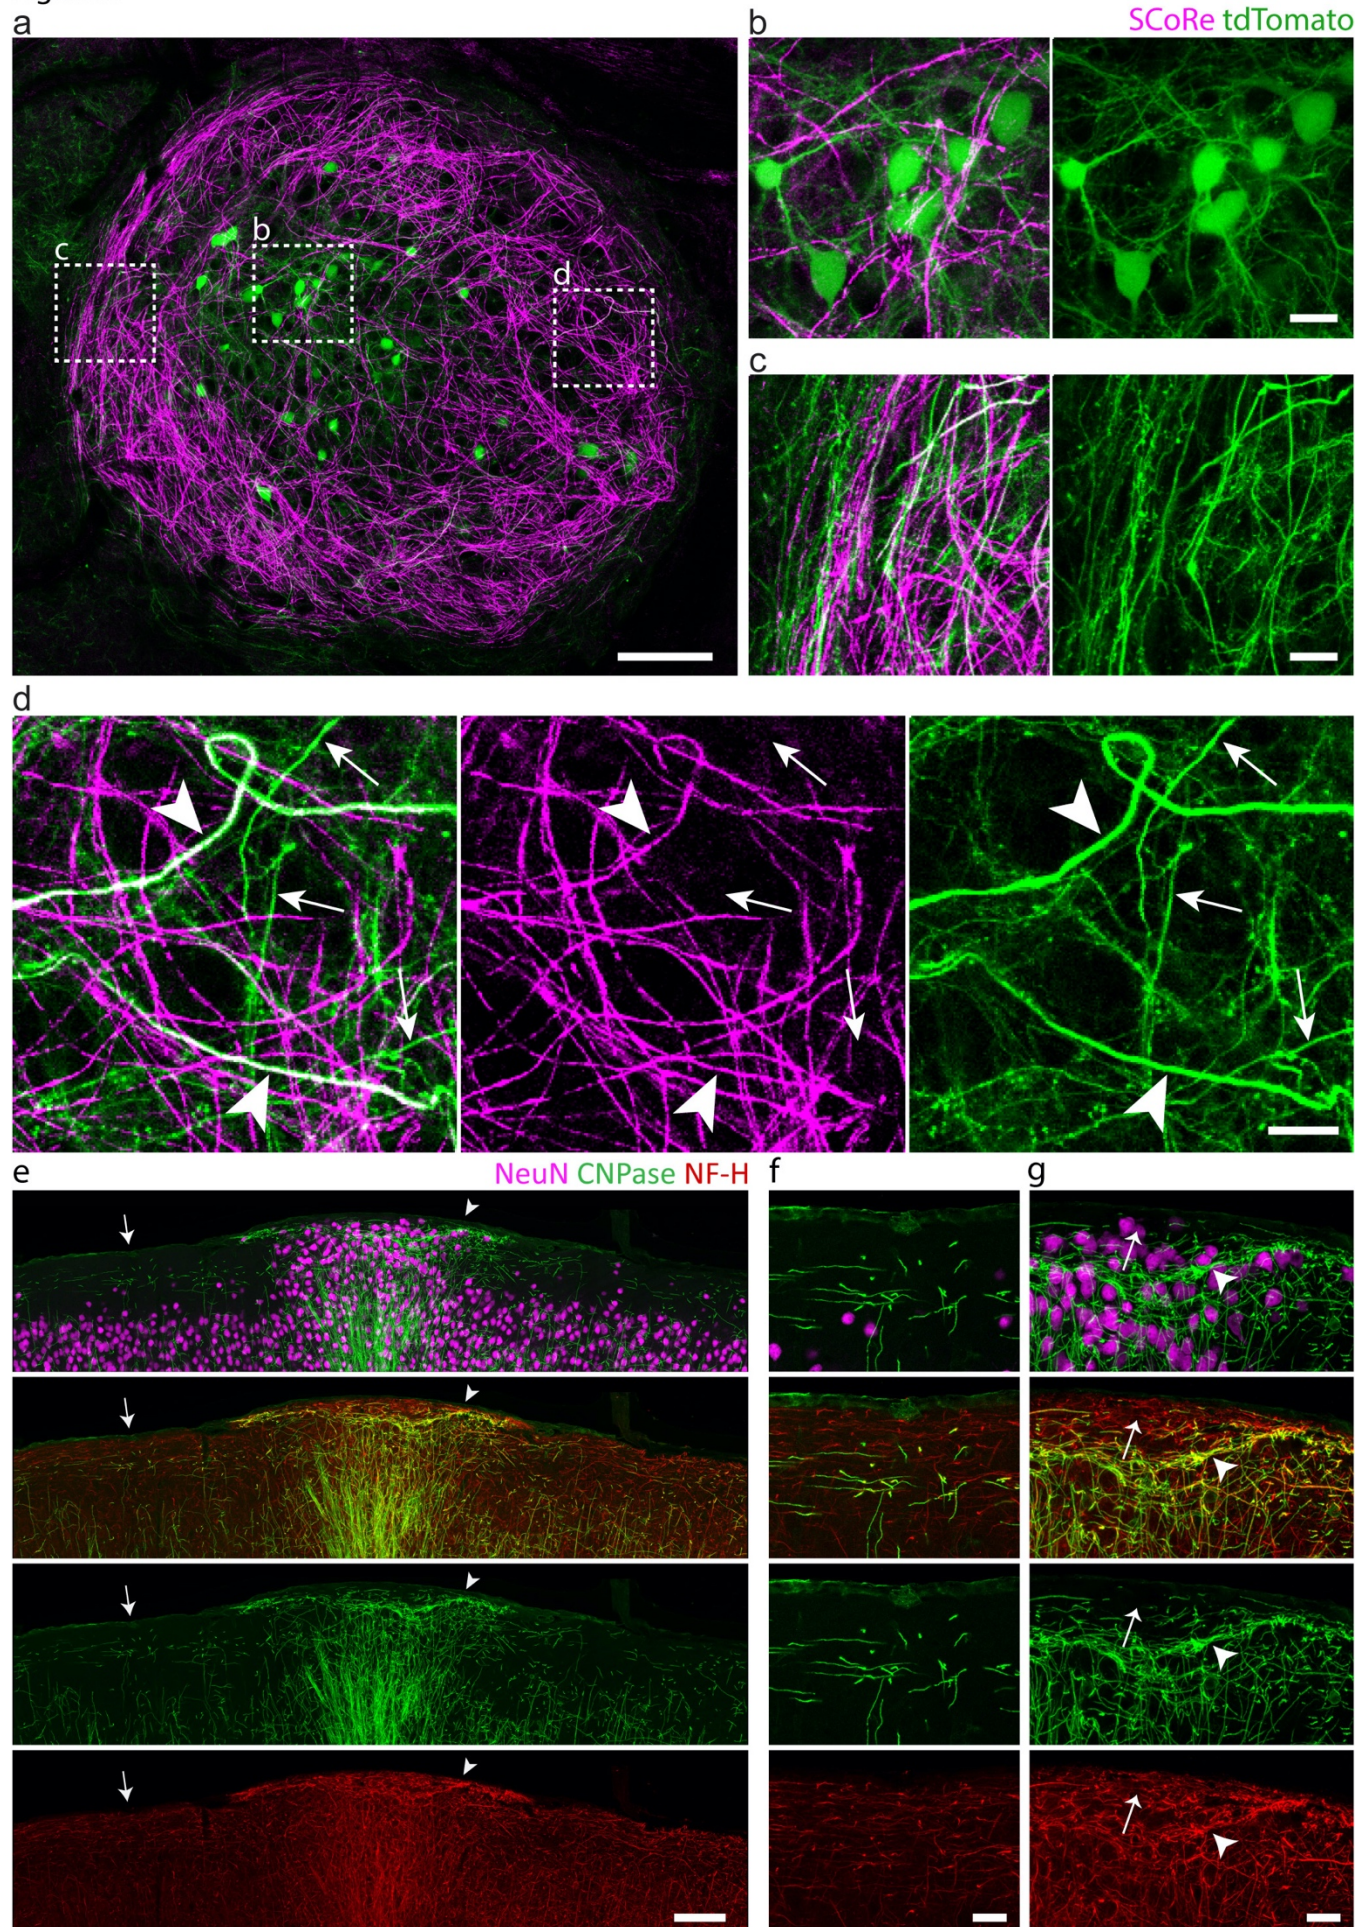

Figure 3 - figure supplement 1

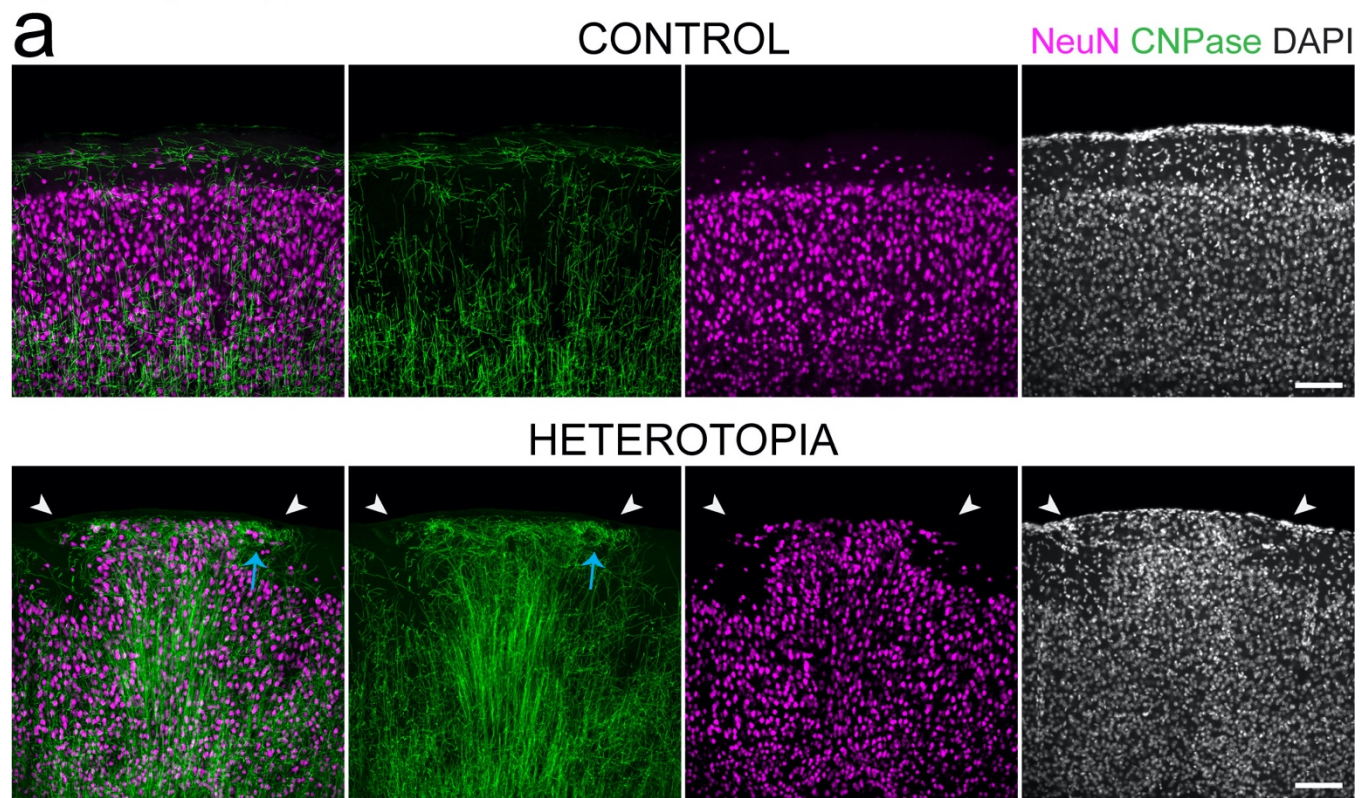

Figure 4

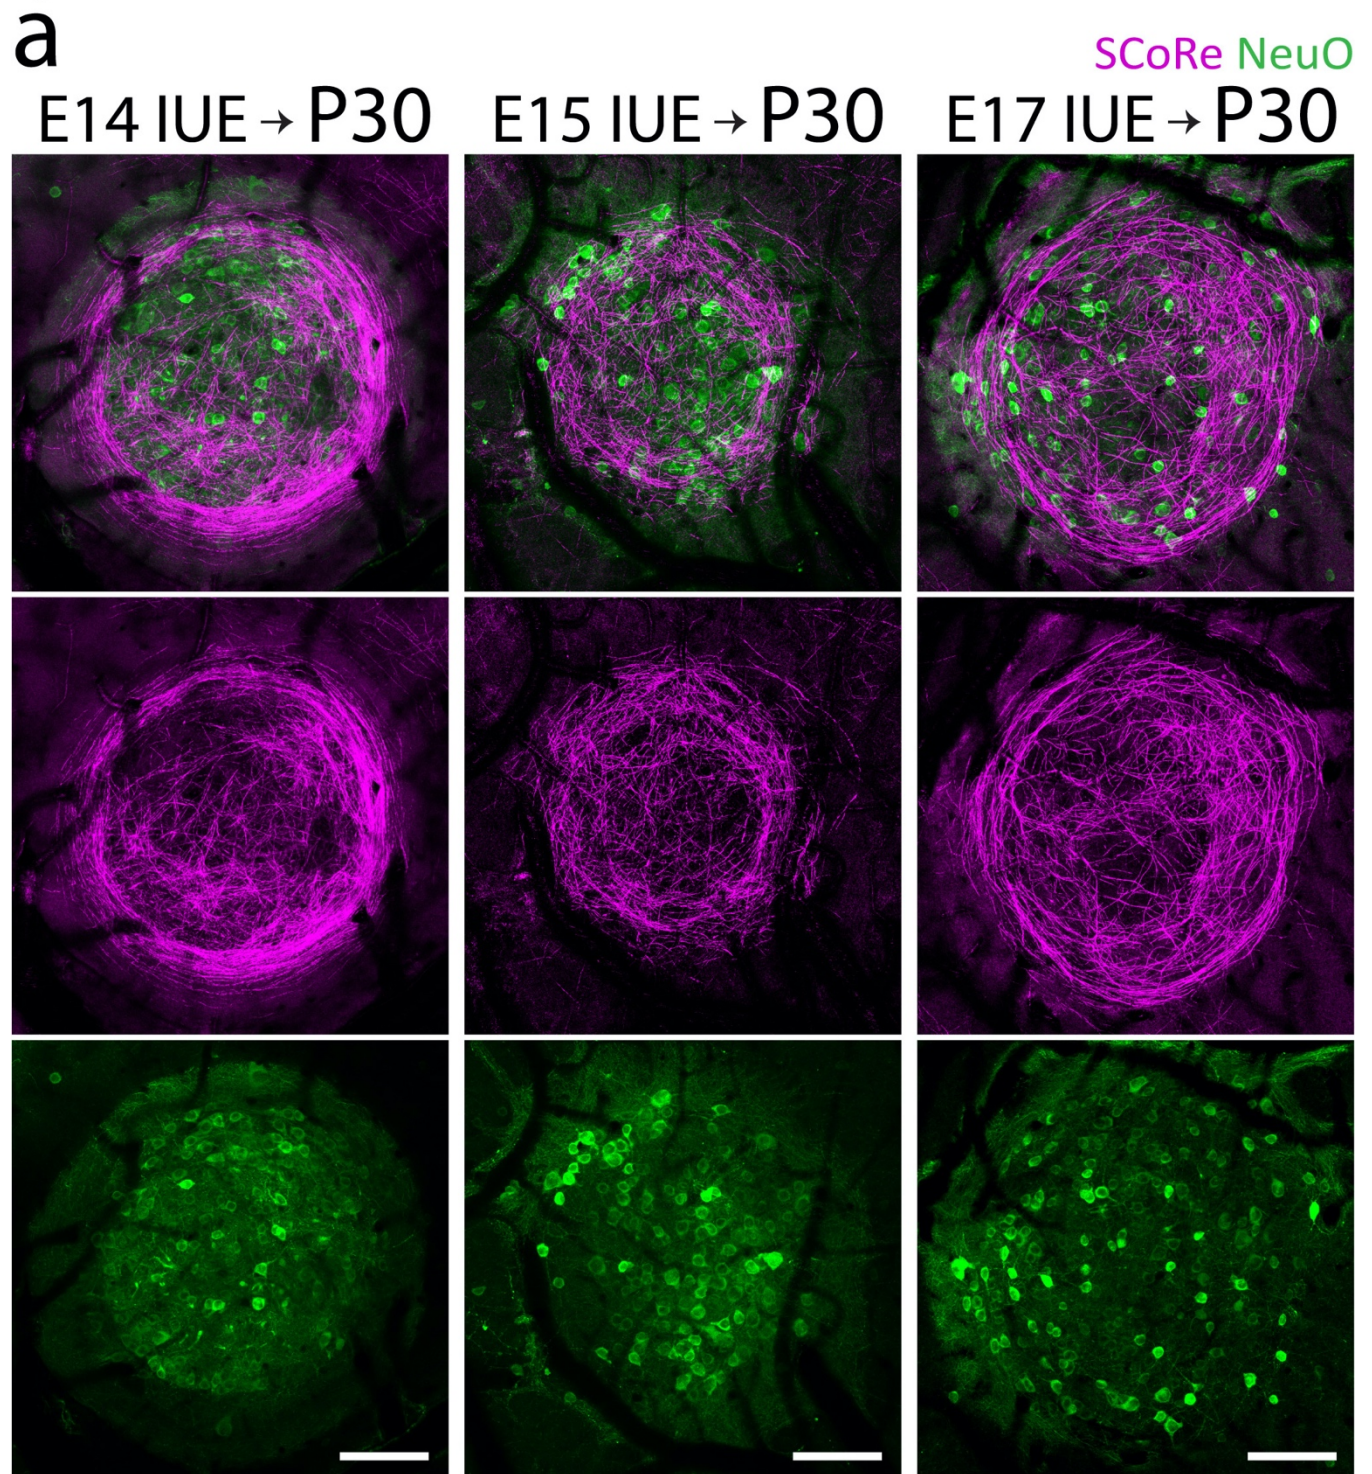

Figure 5

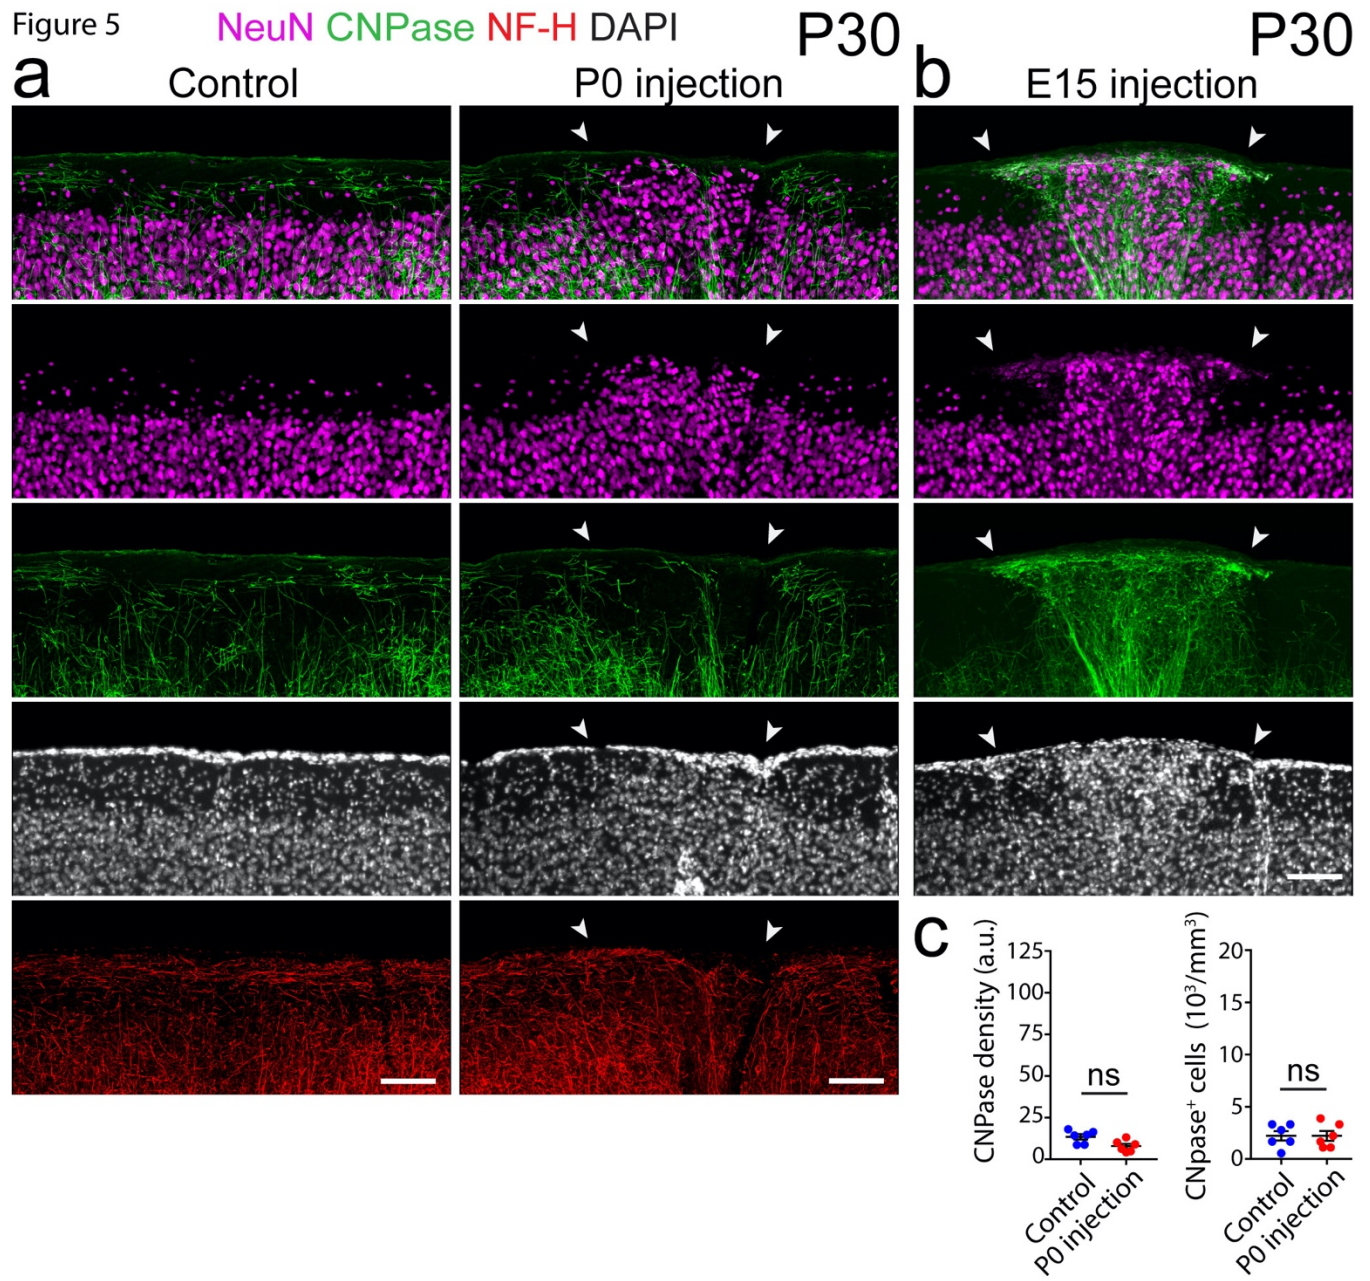

Figure 6

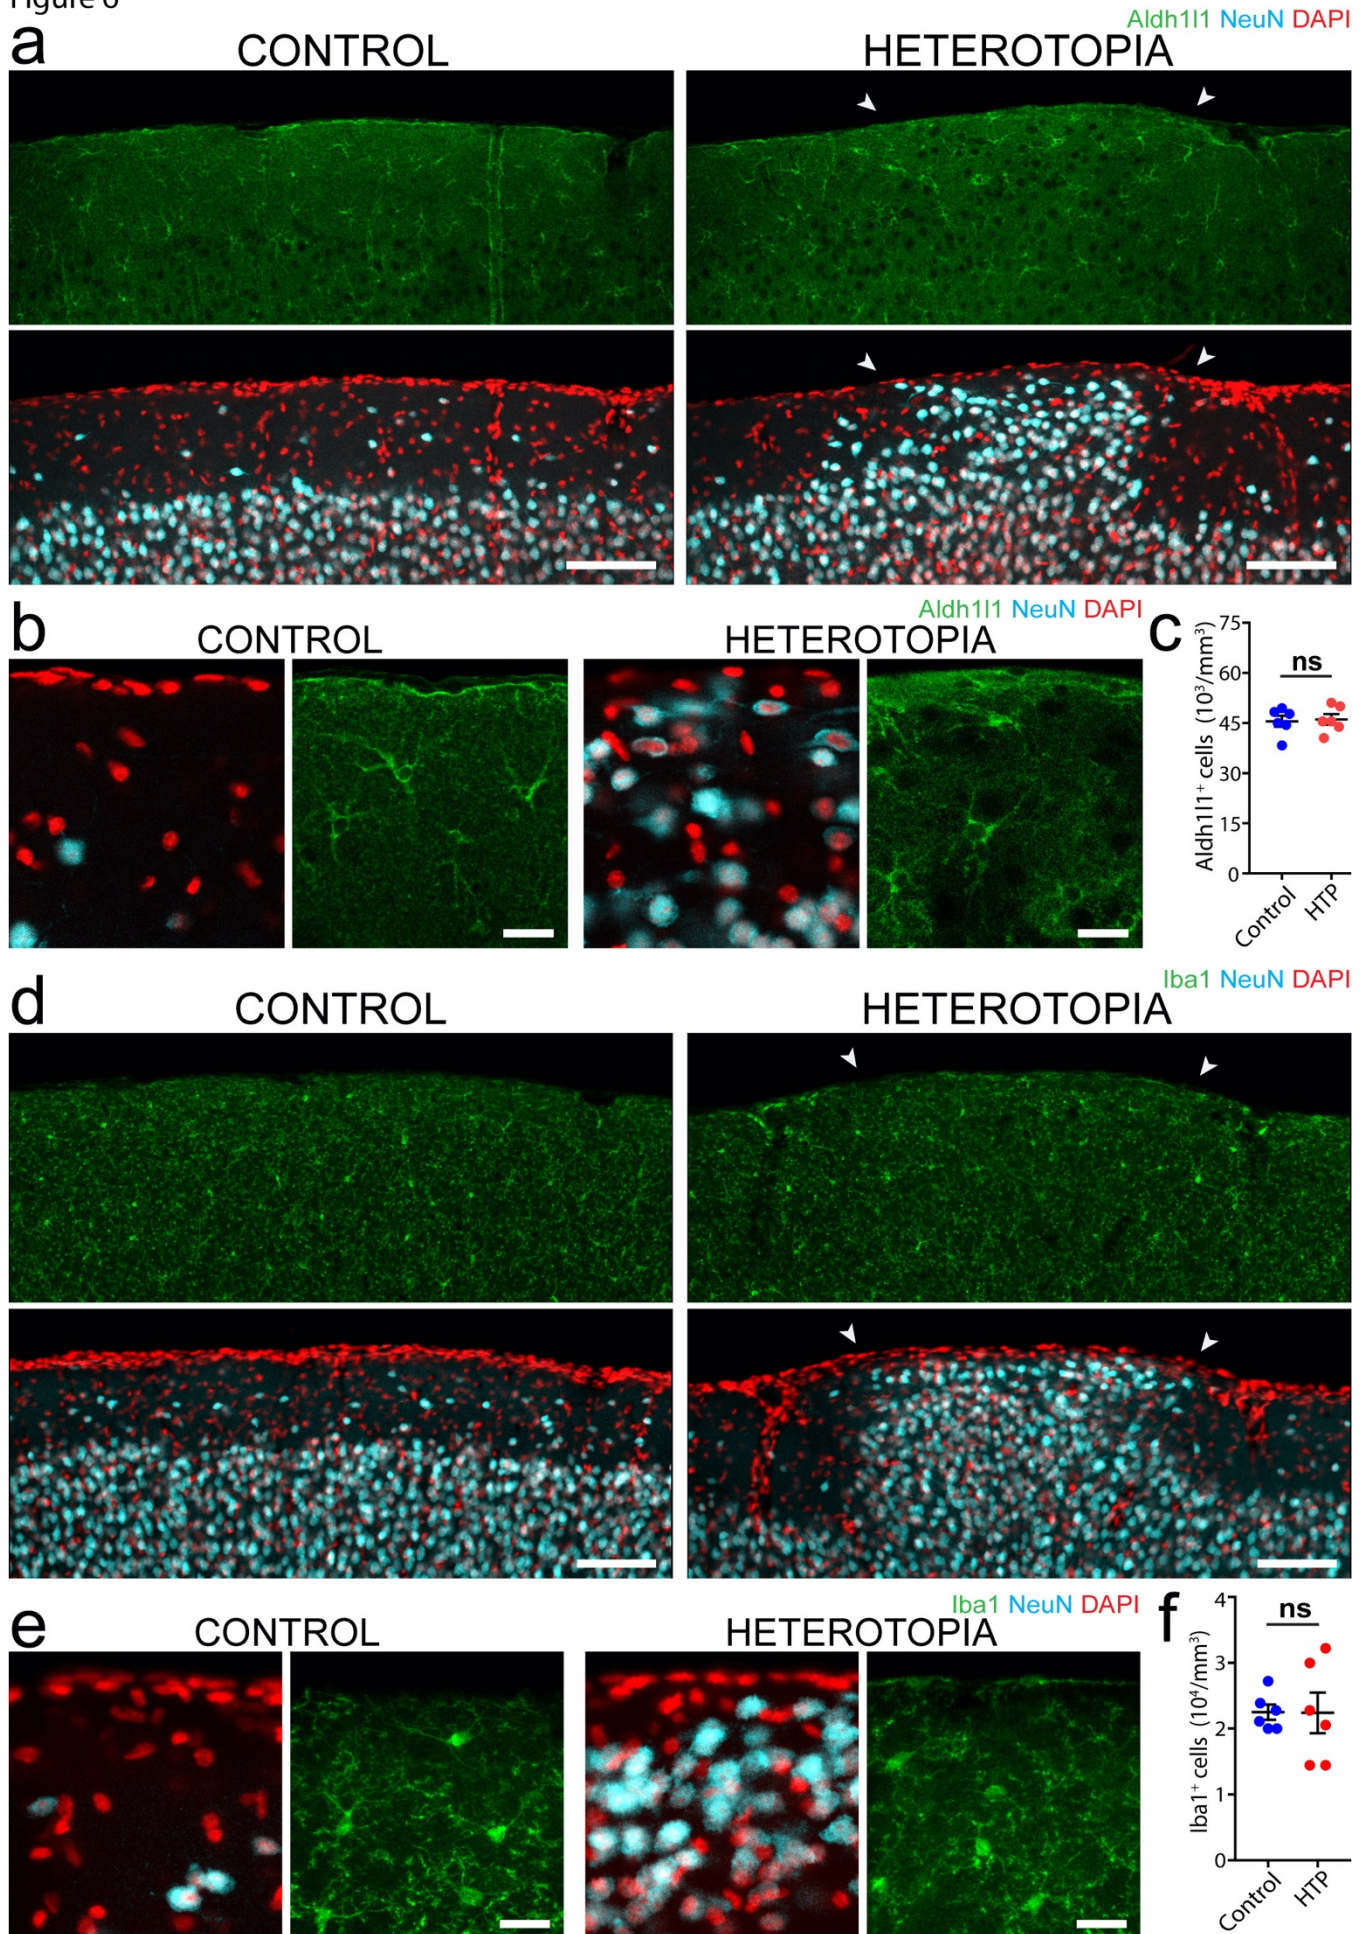



Figure 7

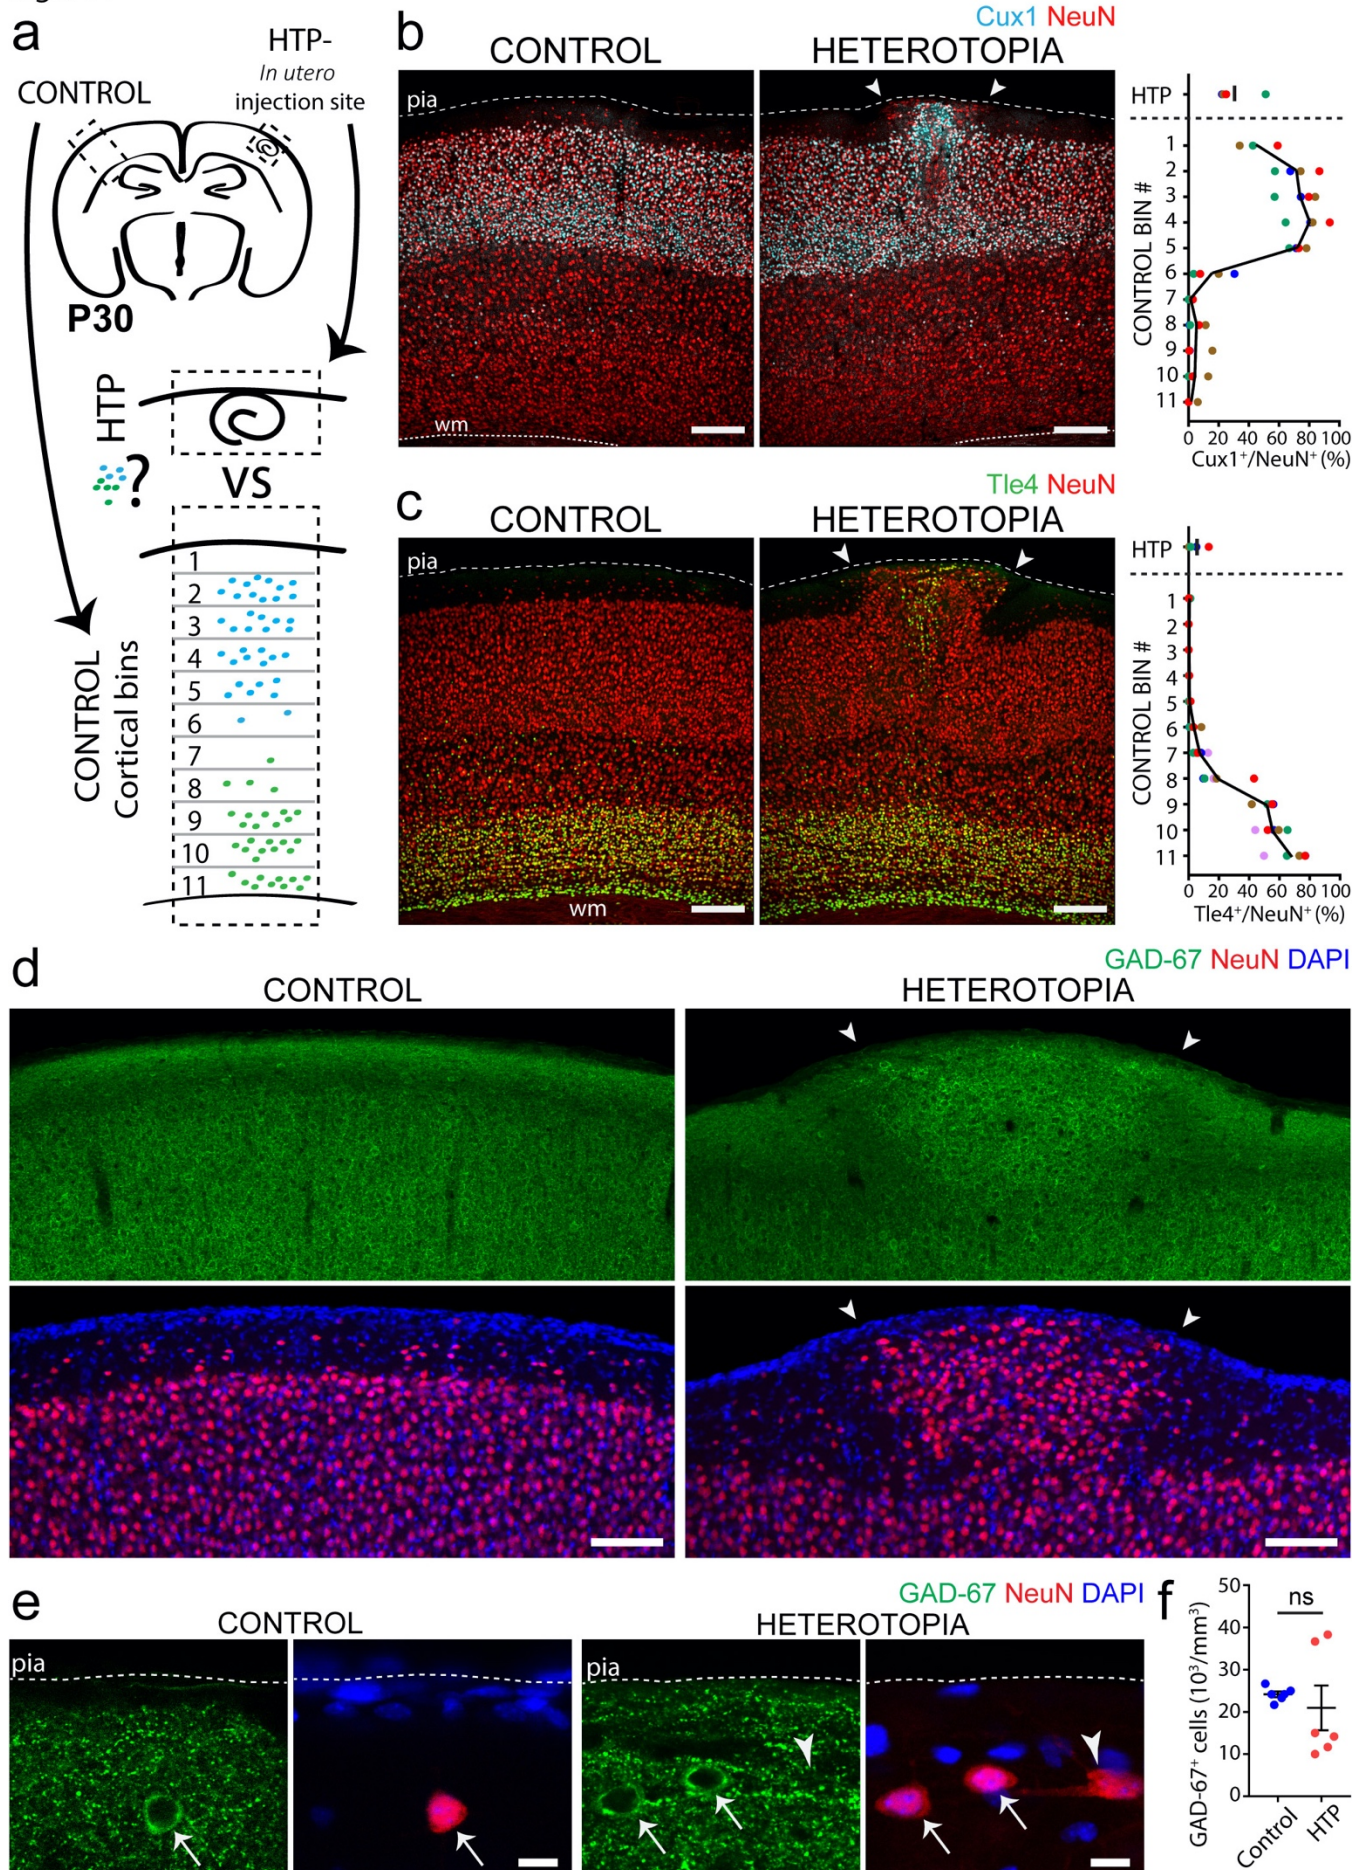

Figure 7–figure supplement 1

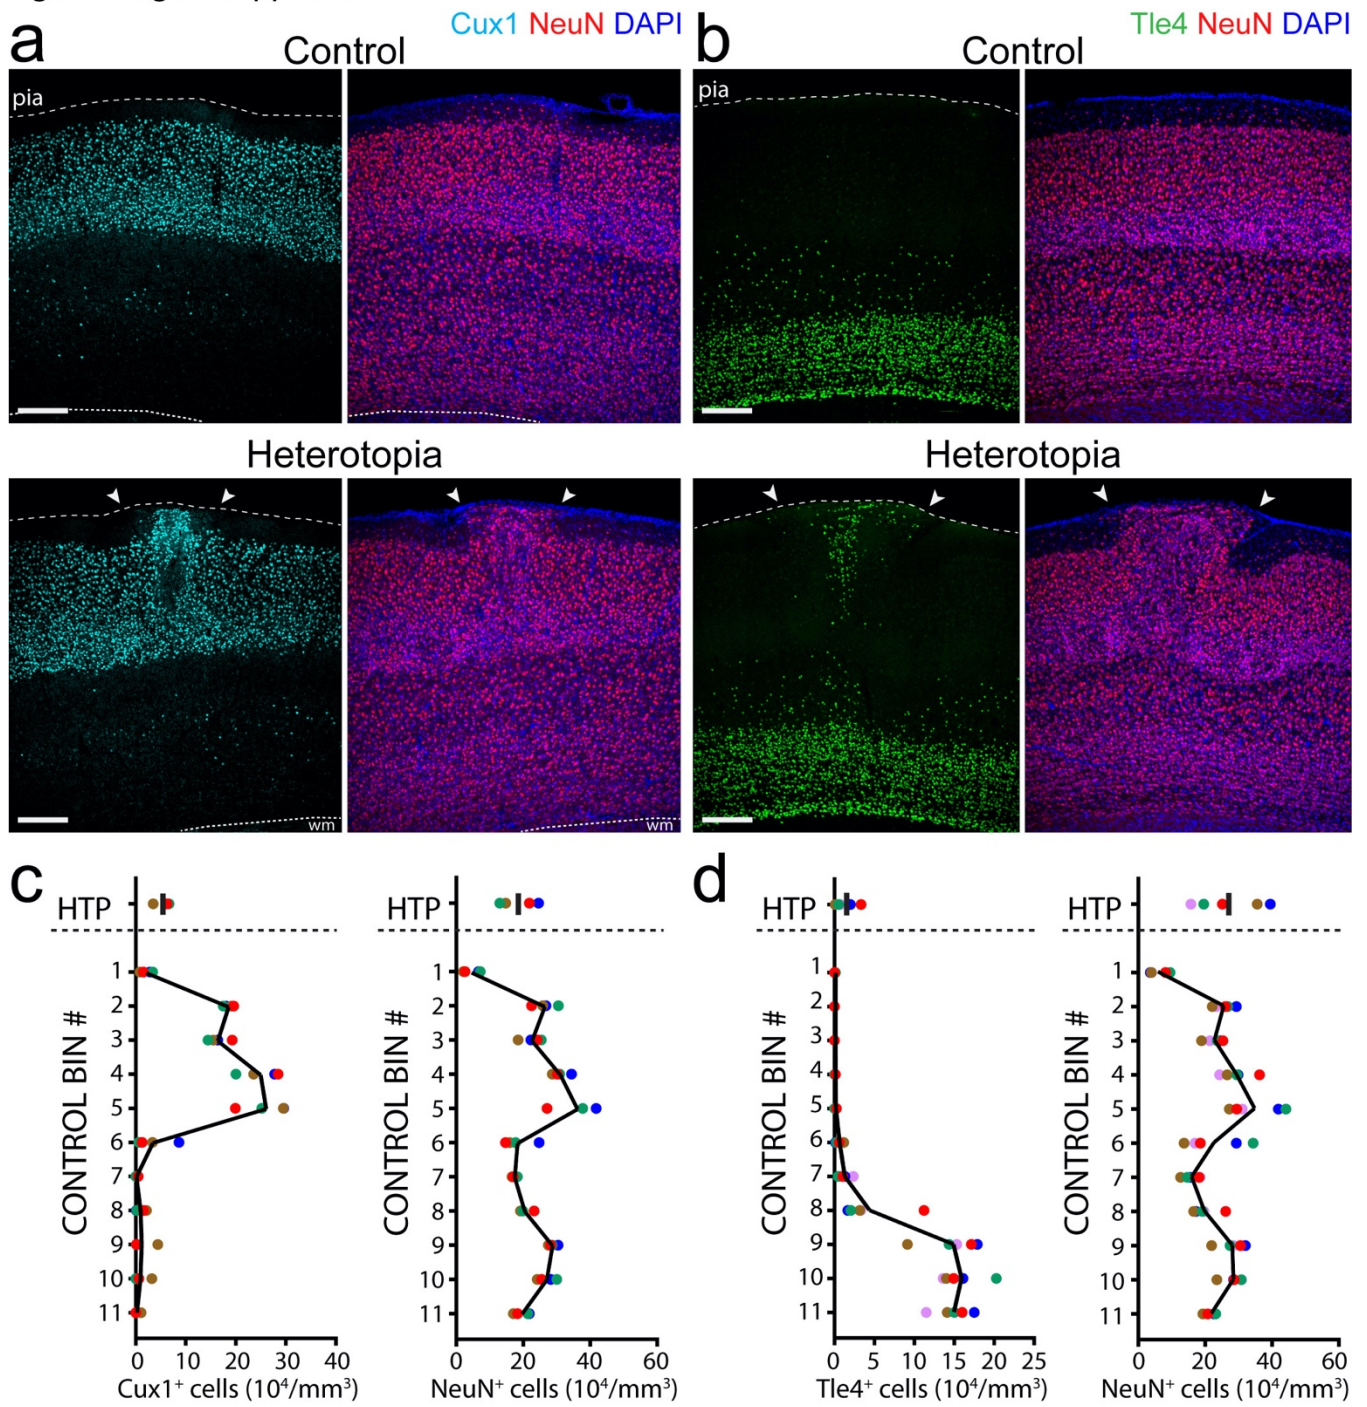

Figure 7–figure supplement 2

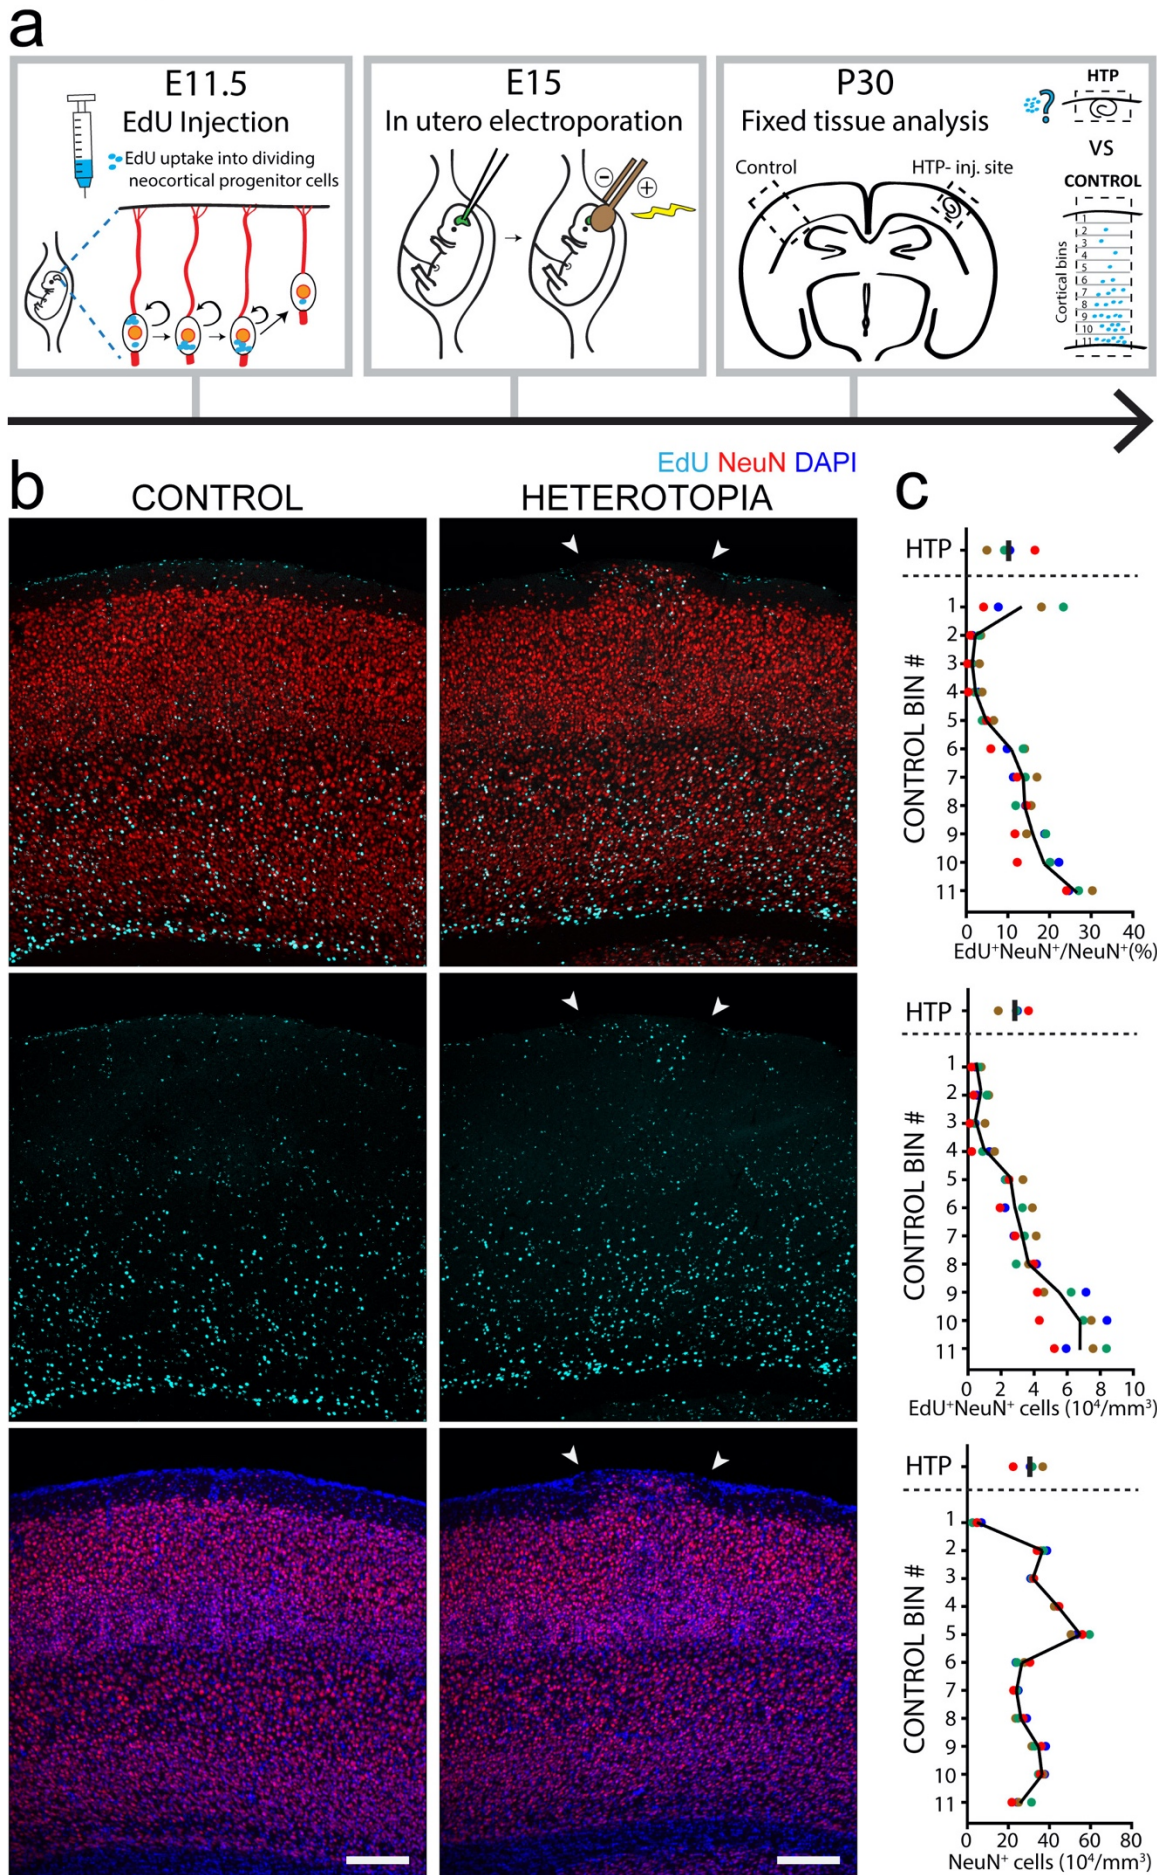

Figure 8

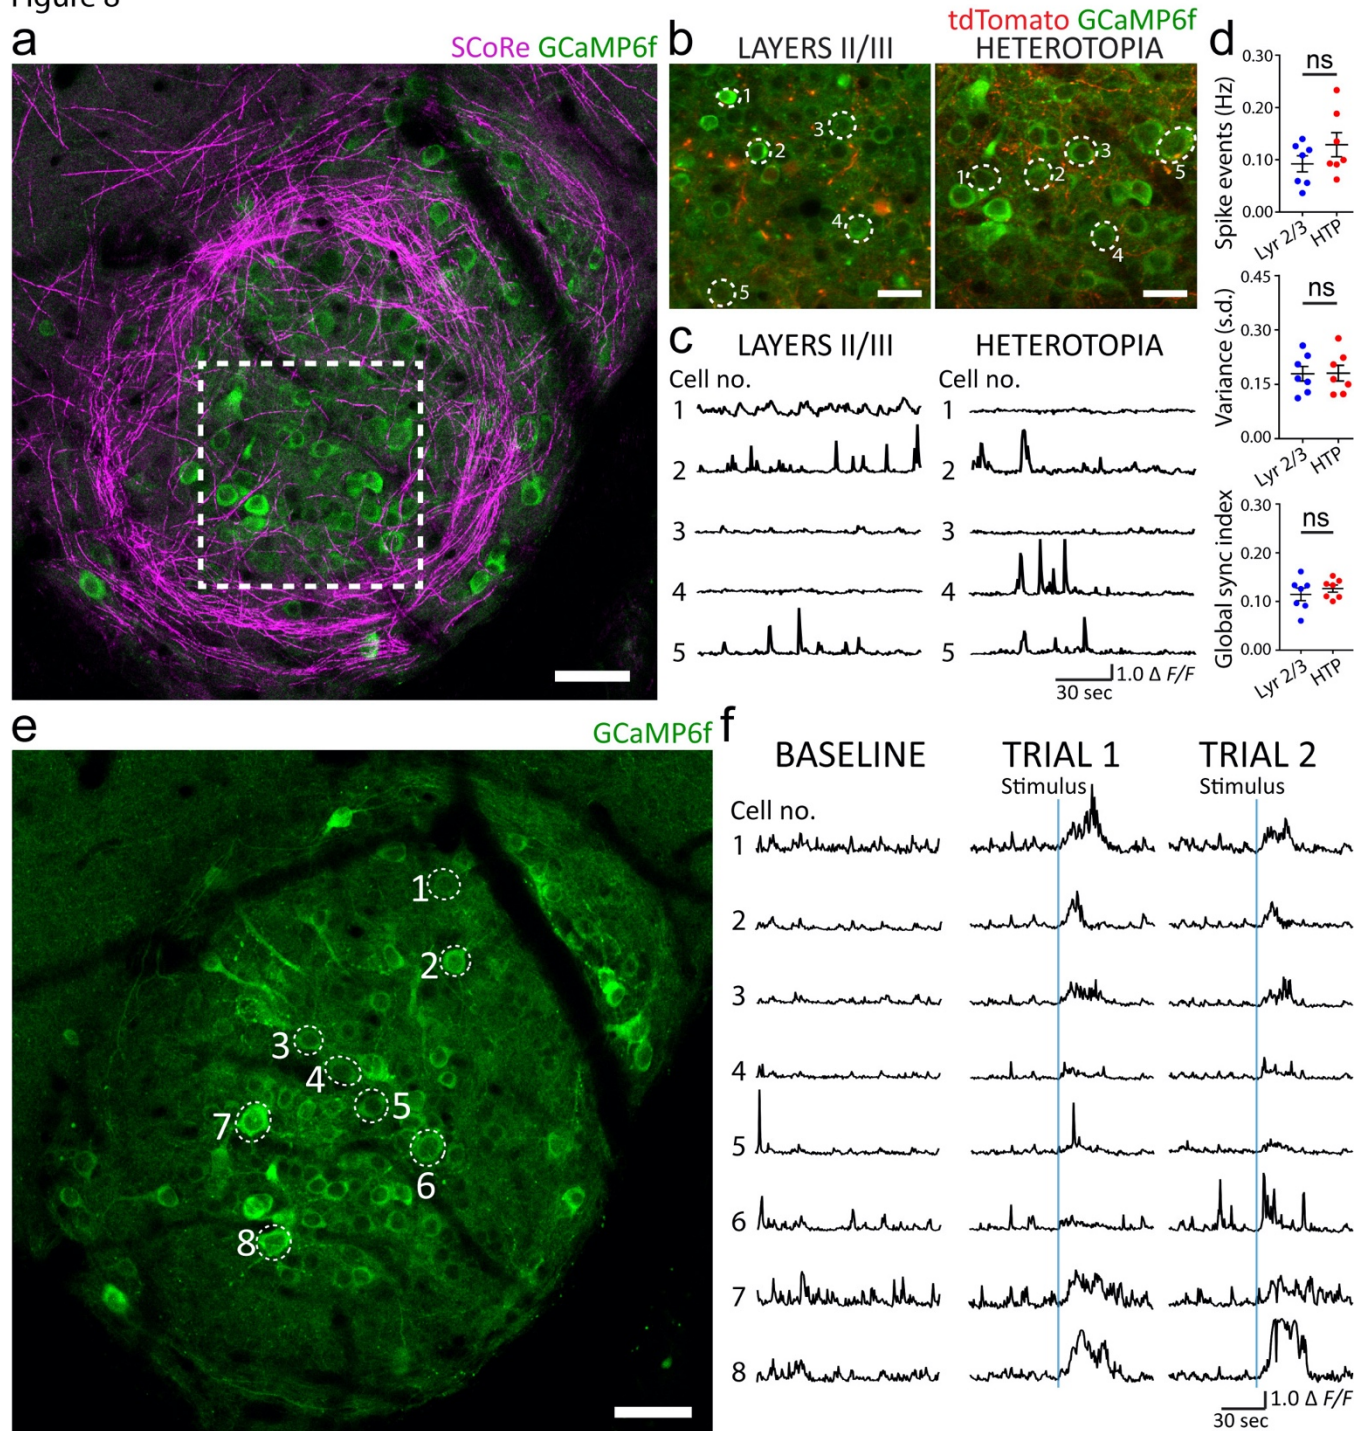

| <b>Supplementary Table 1</b> |                                                        |                    |                                 |                                                                                           |                                                  |
|------------------------------|--------------------------------------------------------|--------------------|---------------------------------|-------------------------------------------------------------------------------------------|--------------------------------------------------|
| <b>Figure Number</b>         | <b>Statistical Test</b>                                | <b>Sample Size</b> | <b>Sample Definition</b>        | <b>P Value</b>                                                                            | <b>Degrees of Freedom and F/T/z/R/ET C value</b> |
| 1b                           | Wilcoxon non-parametric matched-pairs signed rank test | 6                  | number of mice (paired samples) | $p = 0.0313$ for NeuO, HTP vs. Control                                                    | n/a                                              |
| 2d                           | Wilcoxon non-parametric matched-pairs signed rank test | 8                  | number of mice (paired samples) | SCoRe density, $p=0.0078$ for HTP edge vs. Control; $p=0.0078$ for HTP center vs. Control | n/a                                              |
|                              | Wilcoxon non-parametric matched-pairs signed rank test | 6                  | number of mice (paired samples) | $p = 0.0313$ for CNPase density, HTP vs. Control.                                         | n/a                                              |
|                              | Wilcoxon non-parametric matched-pairs signed rank test | 6                  | number of mice (paired samples) | $p = 0.0313$ for CNPase <sup>+</sup> cell bodies, HTP vs. Control.                        | n/a                                              |
| 5c                           | Wilcoxon non-parametric matched-pairs signed rank test | 6                  | number of mice (paired samples) | $p > 0.9999$ for CNPase <sup>+</sup> cell bodies, HTP vs. Control.                        | n/a                                              |
|                              | Wilcoxon non-parametric matched-pairs signed rank test | 6                  | number of mice (paired samples) | $p = 0.0625$ for CNPase density, HTP vs. Control.                                         | n/a                                              |
| 6c                           | Wilcoxon non-parametric matched-pairs signed rank test | 6                  | number of mice (paired samples) | $p = 0.8438$ for Aldh1L1 <sup>+</sup> cell density, HTP vs. Control.                      | n/a                                              |
| 6f                           | Wilcoxon non-parametric matched-pairs signed rank test | 6                  | number of mice (paired samples) | $p = 0.9375$ for Iba <sup>+</sup> cell density, HTP vs. Control                           | n/a                                              |
| 7f                           | Wilcoxon non-parametric matched-pairs signed rank test | 6                  | number of mice (paired samples) | $p = 0.5313$ for GAD67 <sup>+</sup> cell density, HTP vs Control                          | n/a                                              |
| 8d                           | Wilcoxon non-parametric matched-pairs signed rank test | 7                  | number of mice (paired samples) | $p = 0.6875$ for spike event frequency, HTP vs Layers II/III                              | n/a                                              |
|                              | Wilcoxon non-parametric matched-pairs signed rank test | 7                  | number of mice (paired samples) | $p = 0.9375$ for variance (s.d.), HTP vs. Layers II/III                                   | n/a                                              |
|                              | Wilcoxon non-parametric matched-pairs signed rank test | 7                  | number of mice (paired samples) | $p = 0.2969$ for global synchronization index, HTP vs. Layers II/III                      | n/a                                              |
